# Supplementary material for: C–H, Si–H and C–F abstraction with an extremely electron poor I(iii) reagent
Source: Royal Society of Chemistry journal article supplement (doi:10.1039/d3dt03266c), 2023-01-01
Supplement: d3dt03266c1.pdf [file d3dt03266c1.pdf]

Supplementary Information for

C-H, Si-H and C-F abstraction with an extremely electron poor I(III) reagent

Tania, Marcus Sceney, Jason D. Bennetts, Lachlan Barwise, Keith F. White and Jason L.

Dutton\*

Department of Chemistry, La Trobe Institute for Molecular Sciences, La Trobe University,

Melbourne, Victoria, Australia

[j.dutton@latrobe.edu.au](mailto:j.dutton@latrobe.edu.au)

## Table of Contents

|                                                               |           |
|---------------------------------------------------------------|-----------|
| <b>Experimental Details</b> .....                             | <b>3</b>  |
| General Experimental .....                                    | 3         |
| Experimental Methods .....                                    | 4         |
| NMR Spectra.....                                              | 7         |
| Structural Data .....                                         | 22        |
| Reference chemical shifts for NMR Spectra .....               | 23        |
| <b>Computational Details</b> .....                            | <b>24</b> |
| Cartesian Coordinates for optimised compound geometries ..... | 24        |
| <b>References</b> .....                                       | <b>39</b> |

## Experimental Details

### General Experimental

Solvents were dried using an Innovative Technologies Solvent Purification System. The dried solvents were stored under N<sub>2</sub> atmosphere over 3 Å molecular sieves in the glovebox. Deuterated solvents for NMR spectroscopy were purchased from Cambridge Isotope Laboratories and dried by stirring for three days over CaH<sub>2</sub>, distilled prior to use, and stored in the glovebox over 3 Å molecular sieves. All other reagents were purchased from Sigma-Aldrich and used as received. NO<sub>2</sub>-C<sub>6</sub>H<sub>4</sub>-I(OTf)<sub>2</sub> was synthesised by following literature procedure.<sup>1</sup> Glassware was dried in an oven at 120 °C overnight and transferred to the glovebox port or Schlenk line where it was subjected to three vacuum cycles over 30 minutes prior to use. NMR spectra for all experiments were recorded using a Bruker Ultrashield Plus 500 MHz. Single crystals were selected under paratone-n oil, mounted on nylon loops and placed into a cold stream (150 K) of N<sub>2</sub> on a Rigaku SuperNova CCD diffractometer using Cu K $\alpha$  radiation. Structure solution and refinement were performed using the SHELXTL suite of software.

## Experimental Methods

### Reactions of $\text{NO}_2\text{-C}_6\text{H}_4\text{-I(OTf)}_2$ , $\text{PhI(TFA)}_2$ , $\text{PhI(OAc)}_2$ with triethyl silane ( $\text{Et}_3\text{SiH}$ )

A reaction vial was charged with the respective I(III) species (0.04 mmol) in  $\text{CDCl}_3$  (0.5 mL). To this solution,  $\text{Et}_3\text{SiH}$  (6.4  $\mu\text{L}$ , 0.04 mmol) was added while stirring. The sample was analysed by  $^1\text{H}$  and  $^{19}\text{F}$  NMR spectroscopy.

NMR Conversion with respect to  $\text{Et}_3\text{SiH}$ : 100% ( $\text{Et}_3\text{SiOTf}$ ), 76% ( $\text{Et}_3\text{SiTFA}$ ), 27% ( $\text{Et}_3\text{SiOAc}$ )

### Reaction of $\text{NO}_2\text{-C}_6\text{H}_4\text{-I(OTf)}_2$ and $\text{PhI(OAc)(OTf)}$ with triphenylmethane ( $\text{Ph}_3\text{CH}$ )

A reaction vial was charged with  $\text{NO}_2\text{-C}_6\text{H}_4\text{-I(OTf)}_2$  (22 mg, 0.04 mmol) in  $\text{CH}_2\text{Cl}_2$  (3 mL). To this mixture, a solution of  $\text{Ph}_3\text{CH}$  (9.7 mg, 0.04 mmol) in  $\text{CH}_2\text{Cl}_2$  (0.5 mL) was added while stirring. The clear mixture turned yellow immediately. The solution was treated with hexanes (8 mL) and stored at  $-35\text{ }^\circ\text{C}$  for 2 hours resulting in formation of a yellow precipitate. The solid was washed with hexanes (3 x 5 mL) and dried *in vacuo* to afford  $[\text{Ph}_2\text{CHPhI-C}_6\text{H}_4\text{-NO}_2]\text{OTf}$  (yield 75%). Single crystals suitable for X-Ray crystallography were obtained via vapour diffusion ( $\text{CHCl}_3$ :Pentane) at  $-35\text{ }^\circ\text{C}$ .

$^1\text{H}$  NMR (500 MHz,  $\text{CDCl}_3$ )  $\delta$  (ppm): 8.25-8.23 (d, 2H), 8.18-8.16 (d, 2H), 7.95-7.93 (d, 2H), 7.31-7.27 (m, 4H), 7.26-7.24 (m, 3H), 7.05-7.03 (m, 4H), 5.56 (s, 1H)

$^{19}\text{F}$  NMR (472 MHz,  $\text{CDCl}_3$ )  $\delta$  (ppm): -78.29

ESI  $m/z$ : 492.0467

### Reaction of $\text{NO}_2\text{-C}_6\text{H}_4\text{-I(OTf)}_2$ with cycloheptatriene

A reaction vial was charged with  $\text{NO}_2\text{-C}_6\text{H}_4\text{-I(OTf)}_2$  (22 mg, 0.04 mmol) in  $\text{CDCl}_3$  (0.5 mL). To this solution, cycloheptatriene (3.6 mg, 0.04 mmol) was added while stirring. The clear mixture turned yellow immediately and then brown gradually. The sample was analysed by  $^1\text{H}$ ,  $^{13}\text{C}$  and  $^{19}\text{F}$  NMR spectroscopy.

NMR Conversion with respect to  $\text{NO}_2\text{-C}_6\text{H}_4\text{-I}$ : 18% (tropylium)

### **Reactions of NO<sub>2</sub>-C<sub>6</sub>H<sub>4</sub>-I(OTf)<sub>2</sub>, PhI(TFA)<sub>2</sub> with adamantane**

A reaction vial was charged with respective I(III) species (0.04 mmol) in CDCl<sub>3</sub> (0.5 mL). To this solution, adamantane (5.4 mg, 0.04 mmol) was added while stirring. The clear mixture turned yellow immediately. The sample was analysed by <sup>1</sup>H, <sup>13</sup>C and <sup>19</sup>F NMR spectroscopy.

NMR Conversion with respect to adamantane: 17% (adamantyl triflate), 0% (adamantyl TFA)

### **Optimised reaction of NO<sub>2</sub>-C<sub>6</sub>H<sub>4</sub>-I(OTf)<sub>2</sub> with adamantane**

A reaction vial was charged with NO<sub>2</sub>-C<sub>6</sub>H<sub>4</sub>-I(OTf)<sub>2</sub> (22 mg, 0.04 mmol) in CDCl<sub>3</sub> (2 mL). To this solution, adamantane (5.4 mg, 0.04 mmol) was added while stirring. The reaction mixture was heated at 60 °C for 30 minutes. The clear mixture turned pale brown upon heating. The sample was analysed by <sup>1</sup>H, <sup>13</sup>C and <sup>19</sup>F NMR spectroscopy.

NMR Conversion with respect to adamantane: 72% (adamantyl triflate)

### **Reactions of NO<sub>2</sub>-C<sub>6</sub>H<sub>4</sub>-I(OTf)<sub>2</sub> with 1-fluoro adamantane**

A reaction vial was charged with NO<sub>2</sub>-C<sub>6</sub>H<sub>4</sub>-I(OTf)<sub>2</sub> (22 mg, 0.04 mmol) in CDCl<sub>3</sub> (0.5 mL). To this solution, 1-fluoro adamantane (10 mg, 0.04 mmol) was added while stirring. The clear mixture turned pale yellow immediately. The sample was analysed by <sup>1</sup>H, <sup>13</sup>C and <sup>19</sup>F NMR spectroscopy.

NMR Conversion with respect to NO<sub>2</sub>-C<sub>6</sub>H<sub>4</sub>-I: 70% (NO<sub>2</sub>-C<sub>6</sub>H<sub>4</sub>-I(OTf)F)

### **Reaction of NO<sub>2</sub>-C<sub>6</sub>H<sub>4</sub>-I(OTf)<sub>2</sub> with cyclohexene**

A reaction vial was charged with NO<sub>2</sub>-C<sub>6</sub>H<sub>4</sub>-I(OTf)<sub>2</sub> (22 mg, 0.04 mmol) in CDCl<sub>3</sub> (0.5 mL). To this solution, cyclohexene (4 μL, 0.04 mmol) was added while stirring. The clear mixture turned violet immediately. The sample was analysed by <sup>1</sup>H, <sup>13</sup>C and <sup>19</sup>F NMR spectroscopy.

NMR Conversion with respect to NO<sub>2</sub>-C<sub>6</sub>H<sub>4</sub>-I: 2% (benzene)

### **Optimised reaction of NO<sub>2</sub>-C<sub>6</sub>H<sub>4</sub>-I(OTf)<sub>2</sub> with cyclohexene**

A Schlenk flask was charged with NO<sub>2</sub>-C<sub>6</sub>H<sub>4</sub>-I(OTf)<sub>2</sub> (38 mg, 0.07 mmol) in 3 mL CH<sub>2</sub>Cl<sub>2</sub> and cooled to -94 °C. A solution of cyclohexene (14 μL, 0.14 mmol) in 3 mL CH<sub>2</sub>Cl<sub>2</sub> was transferred *via* cannula into this mixture while stirring. The solution turned pale pink with white solid. Subsequently, the reaction was gradually warmed to room temperature and solid dissolved

along with a stark change of colour to clear violet. An aliquot was dissolved in  $\text{CDCl}_3$  and taken for NMR analysis.

NMR Conversion with respect to  $\text{NO}_2\text{-C}_6\text{H}_4\text{-I}$ : 10% (benzene)

#### **Reaction of $\text{NO}_2\text{-C}_6\text{H}_4\text{-I(OTf)}_2$ with limonene**

A reaction vial was charged with  $\text{NO}_2\text{-C}_6\text{H}_4\text{-I(OTf)}_2$  (22 mg, 0.04 mmol) in  $\text{CDCl}_3$  (0.5 mL). To this solution, limonene (6.5  $\mu\text{L}$ , 0.04 mmol) was added while stirring. The clear mixture turned violet immediately. The sample was analysed by  $^1\text{H}$  and  $^{19}\text{F}$  NMR spectroscopy.

NMR Conversion with respect to  $\text{NO}_2\text{-C}_6\text{H}_4\text{-I}$ : 32% (*p*-cymene)

#### **Reaction of $\text{NO}_2\text{-C}_6\text{H}_4\text{-I(OTf)}_2$ with $\alpha$ -pinene**

A reaction vial was charged with  $\text{NO}_2\text{-C}_6\text{H}_4\text{-I(OTf)}_2$  (22 mg, 0.04 mmol) in  $\text{CDCl}_3$  (0.5 mL). To this solution,  $\alpha$ -pinene (6.4  $\mu\text{L}$ , 0.04 mmol) was added while stirring. The clear mixture turned dark red immediately. The sample was analysed by  $^1\text{H}$  and  $^{19}\text{F}$  NMR spectroscopy.

NMR Conversion with respect to  $\text{NO}_2\text{-C}_6\text{H}_4\text{-I}$ : 10% (*p*-cymene), 13% ( $[\text{NO}_2\text{-C}_6\text{H}_4\text{-I}(\text{p-cymene})][\text{OTf}]$ )

#### **Optimised reaction of $\text{NO}_2\text{-C}_6\text{H}_4\text{-I(OTf)}_2$ with $\alpha$ -pinene**

A Schlenk flask was charged with  $\text{NO}_2\text{-C}_6\text{H}_4\text{-I(OTf)}_2$  (20 mg, 0.036 mmol) in 3 mL  $\text{CH}_2\text{Cl}_2$  and cooled to  $-94^\circ\text{C}$ . A solution of  $\alpha$ -pinene (7.0  $\mu\text{L}$ , 0.04 mmol) in 3 mL  $\text{CH}_2\text{Cl}_2$  was transferred *via* cannula into this mixture while stirring. The solution turned pale yellow. Subsequently, the reaction was gradually warmed to room temperature and the colour changed to clear brown. The excess solvent was removed *in vacuo* to obtain brown solid. The solid was dissolved in  $\text{CDCl}_3$  and taken for NMR analysis.

NMR Conversion with respect to  $\text{NO}_2\text{-C}_6\text{H}_4\text{-I}$ : 20% (*p*-cymene)

#### **Reactions of $\text{PhI(OAc)(OTf)}$ with substrates**

A reaction vial was charged with  $\text{PhI(OAc)}_2$  (12 mg, 0.04 mmol) and TMSOTf (6.8  $\mu\text{L}$ , 0.04 mmol) in  $\text{CDCl}_3$  (0.5 mL). To this solution, respective substrate (0.04 mmol) was added while stirring. The reaction samples were analysed by  $^1\text{H}$  and  $^{19}\text{F}$  NMR spectroscopy.

NMR conversions with respect to  $\text{NO}_2\text{-C}_6\text{H}_4\text{-I}$  and residual I(III):

Et<sub>3</sub>SiH (1.24 eq) → Et<sub>3</sub>SiOAc (51%) + Et<sub>3</sub>SiOTf (64%\*). \*Excess Et<sub>3</sub>SiOTf is from the reaction of HOTf with Et<sub>3</sub>SiH.

Ph<sub>3</sub>CH → No reaction (17 h).

Cycloheptatriene → Tropylium (2%) + Benzaldehyde (3%) + Benzene (3%).

Adamantane → No reaction (17 h).

1-fluoro adamantane → No reaction (17 h).

Cyclohexene → Benzene (0.3%).

Limonene → *p*-cymene (19%).

α-pinene → *p*-cymene (37%).

### Synthesis of 3-CF<sub>3</sub>-C<sub>6</sub>H<sub>4</sub>-IF<sub>2</sub>

A reaction vial was charged with 3-CF<sub>3</sub>-C<sub>6</sub>H<sub>4</sub>-I (10.6 μL, 0.074 mmol) in 2 mL CH<sub>2</sub>Cl<sub>2</sub>. To this solution, XeF<sub>2</sub> (12.5 mg, 0.074 mmol) was added and then spiked with TMSOTf. The reaction slightly turned yellow and was left to stir for 30 minutes. The solvent was reduced *in vacuo* to yield a white solid. The solid was redissolved in CH<sub>2</sub>Cl<sub>2</sub> and the solvent was removed *in vacuo* to ensure removal of any remaining 3-CF<sub>3</sub>-C<sub>6</sub>H<sub>4</sub>-I. This process was repeated to yield 3-CF<sub>3</sub>-C<sub>6</sub>H<sub>4</sub>-IF<sub>2</sub> (20.3 mg, 89% yield), with subsequent NMR analysis matching a previous report.<sup>2</sup>

<sup>1</sup>H NMR (500 MHz, CDCl<sub>3</sub>) δ (ppm): 8.20 (s, 1H), 8.12 (d, 1H), 7.81-7.73 (m, 2H)

<sup>19</sup>F NMR (472 MHz, CDCl<sub>3</sub>) δ (ppm): -62.79, -176.89

### Synthesis of 3-CF<sub>3</sub>-C<sub>6</sub>H<sub>4</sub>-IF(OTf)

A reaction vial was charged with 3-CF<sub>3</sub>-C<sub>6</sub>H<sub>4</sub>-I (10.6 μL, 0.074 mmol) in 2 mL CH<sub>2</sub>Cl<sub>2</sub>. To this solution, XeF<sub>2</sub> (12.5 mg, 0.074 mmol) was added and then spiked with TMSOTf. The reaction slightly turned yellow, and then TMSOTf (13.5 μL, 0.074 mmol) was added two minutes later which turned darker yellow.

<sup>1</sup>H NMR (500 MHz, CDCl<sub>3</sub>) δ (ppm): 8.47 (s, 1H), 8.42 (d, 1H, J = 8.58 Hz), 8.01 (d, 1H, J = 8.10 Hz), 7.85 (t, 1H, J = 8.10 Hz)

$^{19}\text{F}$  NMR (472 MHz,  $\text{CDCl}_3$ )  $\delta$  (ppm): -62.99, -76.74, -192.90

### ***In situ* synthesis of 3-CF<sub>3</sub>-C<sub>6</sub>H<sub>4</sub>-I(OTf)<sub>2</sub>**

A reaction vial was charged with 3-CF<sub>3</sub>-C<sub>6</sub>H<sub>4</sub>-I (10.6  $\mu\text{L}$ , 0.074 mmol) in 2 mL  $\text{CH}_2\text{Cl}_2$ . To this solution,  $\text{XeF}_2$  (12.5 mg, 0.074 mmol) was added and then spiked with TMSOTf. The reaction slightly turned yellow. Then TMSOTf (27  $\mu\text{L}$ , 0.15 mmol) was added two minutes later and the solution immediately turned a darker yellow. The reaction was left to stir for 5 minutes, and then the solvent was removed *in vacuo* to yield a beige solid. The solid was redissolved in  $\text{CH}_2\text{Cl}_2$  and the solvent was removed *in vacuo* to ensure removal of any remaining 3-CF<sub>3</sub>-C<sub>6</sub>H<sub>4</sub>-I. This process was repeated to yield 3-CF<sub>3</sub>-C<sub>6</sub>H<sub>4</sub>-I(OTf)<sub>2</sub> as a beige solid (26.4 mg, 63% yield).

$^1\text{H}$  NMR (500 MHz,  $\text{CDCl}_3$ )  $\delta$  (ppm): 8.67 (s, 1H), 8.63 (d, 1H,  $J = 8.34$  Hz), 8.15 (d, 1H,  $J = 8.10$  Hz), 7.93 (t, 1H,  $J = 8.1$  Hz)

$^{19}\text{F}$  NMR (472 MHz,  $\text{CDCl}_3$ )  $\delta$  (ppm): -63.03, -75.56

$^{13}\text{C}$  NMR (500 MHz,  $\text{CDCl}_3$ )  $\delta$  (ppm): 132.42, 135.37, 135.09, 133.58, 133.36, 132.69, 126.10, 123.20, 119.06, 116.54

### **Synthesis of 3-CF<sub>3</sub>-C<sub>6</sub>H<sub>4</sub>-I(OTf)<sub>2</sub> from 3-CF<sub>3</sub>-C<sub>6</sub>H<sub>4</sub>-IF<sub>2</sub>**

A reaction vial was charged with 3-CF<sub>3</sub>-C<sub>6</sub>H<sub>4</sub>-IF<sub>2</sub> (20 mg, 0.065 mmol) in 2 mL  $\text{CH}_2\text{Cl}_2$ . To this solution, TMSOTf (23.5  $\mu\text{L}$ , 0.13 mmol) was added and the solution turned dark yellow. The reaction was left to stir for 5 minutes. The solvent was removed *in vacuo* to yield a beige solid. The solid was redissolved in  $\text{CH}_2\text{Cl}_2$  and the solvent removed *in vacuo*. This process was repeated to yield 3-CF<sub>3</sub>-C<sub>6</sub>H<sub>4</sub>-I(OTf)<sub>2</sub> as a beige solid (24.8 mg, 67% yield). The acquired  $^1\text{H}$ ,  $^{19}\text{F}$  and  $^{13}\text{C}$  NMR spectra of the isolated product was identical to 3-CF<sub>3</sub>-C<sub>6</sub>H<sub>4</sub>-I(OTf)<sub>2</sub> made using the *in situ* method reported above.

### **Reaction of 3-CF<sub>3</sub>-C<sub>6</sub>H<sub>4</sub>-I(OTf)<sub>2</sub> with adamantane**

A reaction vial was charged with 3-CF<sub>3</sub>-C<sub>6</sub>H<sub>4</sub>-I (10.6  $\mu\text{L}$ , 0.074 mmol) in 2 mL  $\text{CH}_2\text{Cl}_2$ . To this solution,  $\text{XeF}_2$  (12.5 mg, 0.074 mmol) was added and then spiked with TMSOTf. The reaction slightly turned yellow, and then TMSOTf (27  $\mu\text{L}$ , 0.15 mmol) was added two minutes later which turned darker yellow. After 5 minutes, adamantane (10 mg, 0.074 mmol) was added and the solution became lighter yellow. The reaction was left to stir for 5 minutes, and then



the solvent was removed *in vacuo* to produce a dark brown solid. The solid was redissolved in  $\text{CH}_2\text{Cl}_2$  and the solvent was removed *in vacuo* to ensure removal of any remaining 3- $\text{CF}_3$ - $\text{C}_6\text{H}_4$ -I. This process was repeated, and the remaining dark brown solid was dried to yield adamantyl triflate (15.2 mg, 72% yield).

## NMR Spectra

A:  $p\text{-NO}_2\text{-C}_6\text{H}_4\text{-I}$   
B:  $\text{Et}_3\text{SiOTf}$

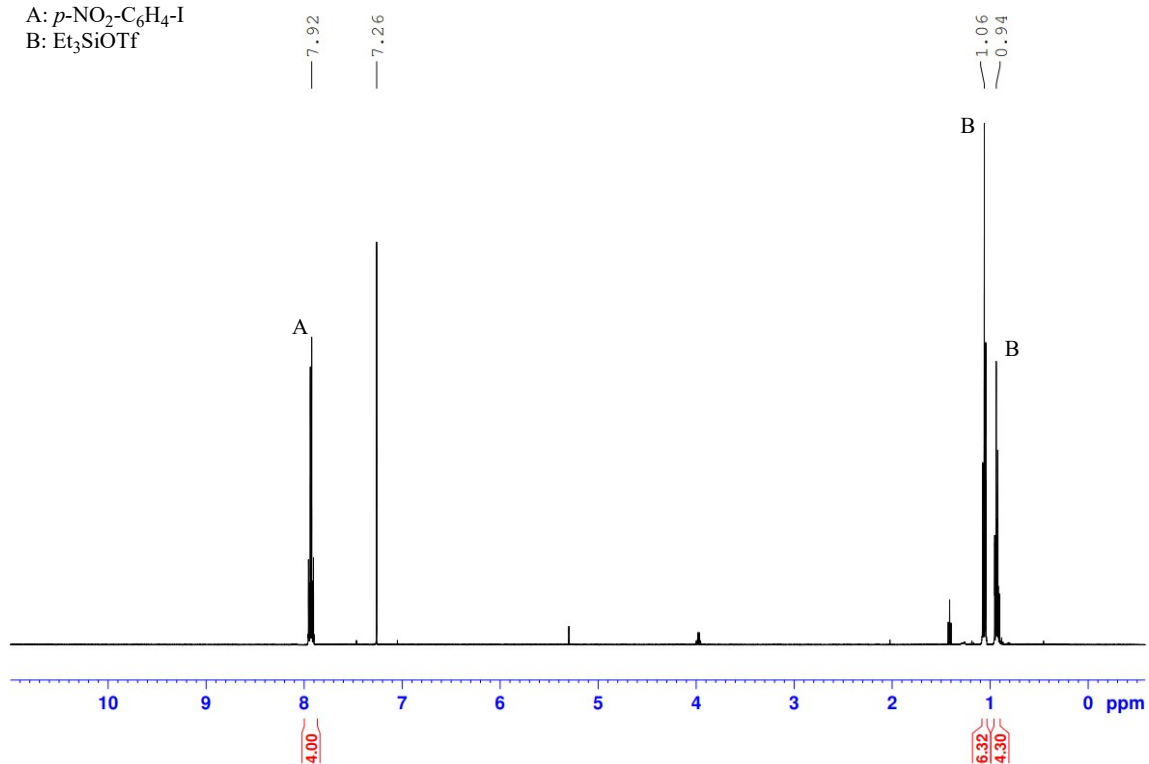

Figure S 1:  $^1\text{H}$  NMR of  $\text{NO}_2\text{-C}_6\text{H}_4\text{-I}(\text{OTf})_2$  with  $\text{Et}_3\text{SiH}$  in  $\text{CDCl}_3$

A: HOTf  
B:  $\text{Et}_3\text{SiOTf}$

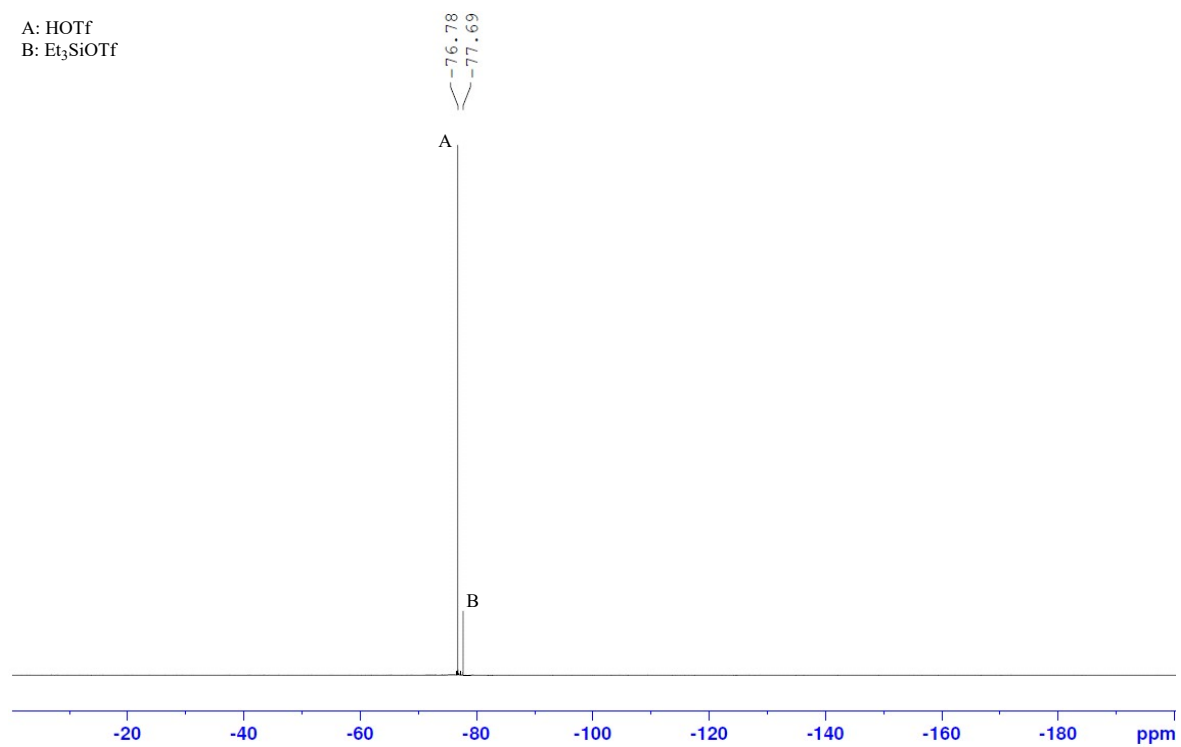

Figure S 2:  $^{19}\text{F}$  NMR of  $\text{NO}_2\text{-C}_6\text{H}_4\text{-I}(\text{OTf})_2$  with  $\text{Et}_3\text{SiH}$  in  $\text{CDCl}_3$

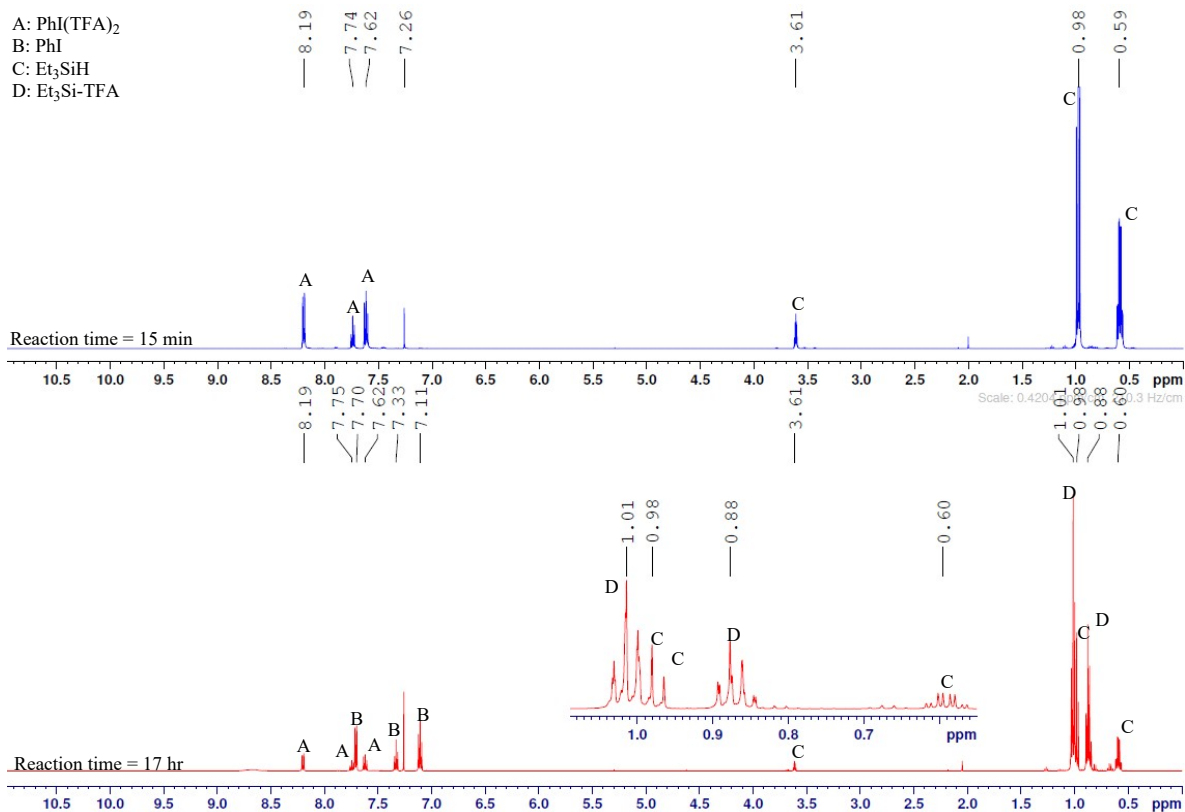

Figure S 3:  $^1\text{H}$  NMR of  $\text{PhI}(\text{TFA})_2$  with  $\text{Et}_3\text{SiH}$  in  $\text{CDCl}_3$  monitored over time

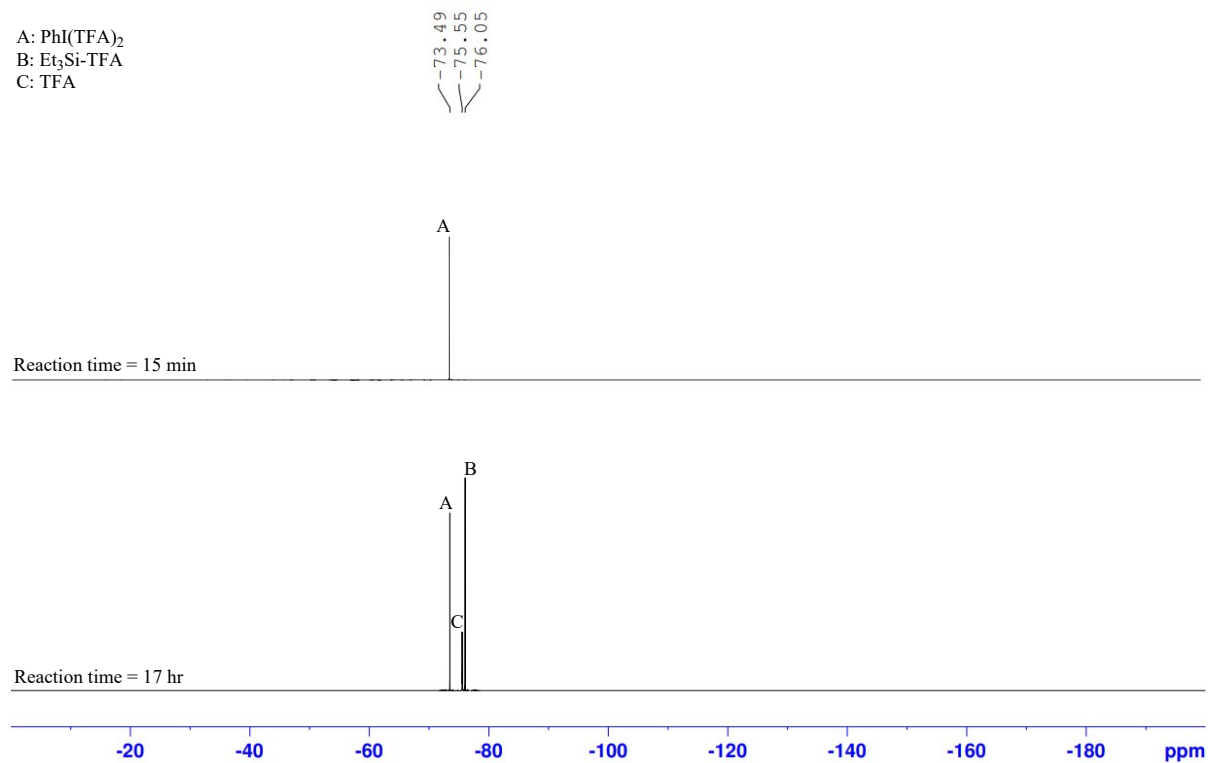

Figure S 4:  $^{19}\text{F}$  NMR of  $\text{PhI}(\text{TFA})_2$  with  $\text{Et}_3\text{SiH}$  in  $\text{CDCl}_3$  monitored over time

A:  $\text{PhI}(\text{OAc})_2$   
 B:  $\text{PhI}$   
 C:  $\text{Et}_3\text{SiH}$   
 D:  $\text{Et}_3\text{SiOAc}$   
 E:  $\text{HOAc}$

8.10  
 8.08  
 7.71  
 7.69  
 7.59  
 7.50  
 7.32  
 7.26  
 7.10  
 7.10

3.61

2.09  
2.06  
2.01

0.97  
0.77  
0.60  
0.59

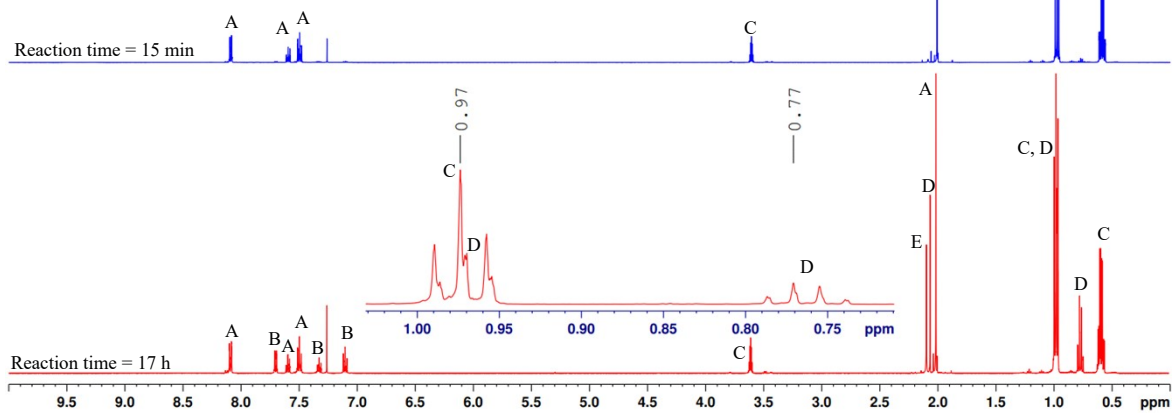

Figure S 5:  $^1\text{H}$  NMR of  $\text{PhI}(\text{OAc})_2$  with  $\text{Et}_3\text{SiH}$  in  $\text{CDCl}_3$  monitored over time

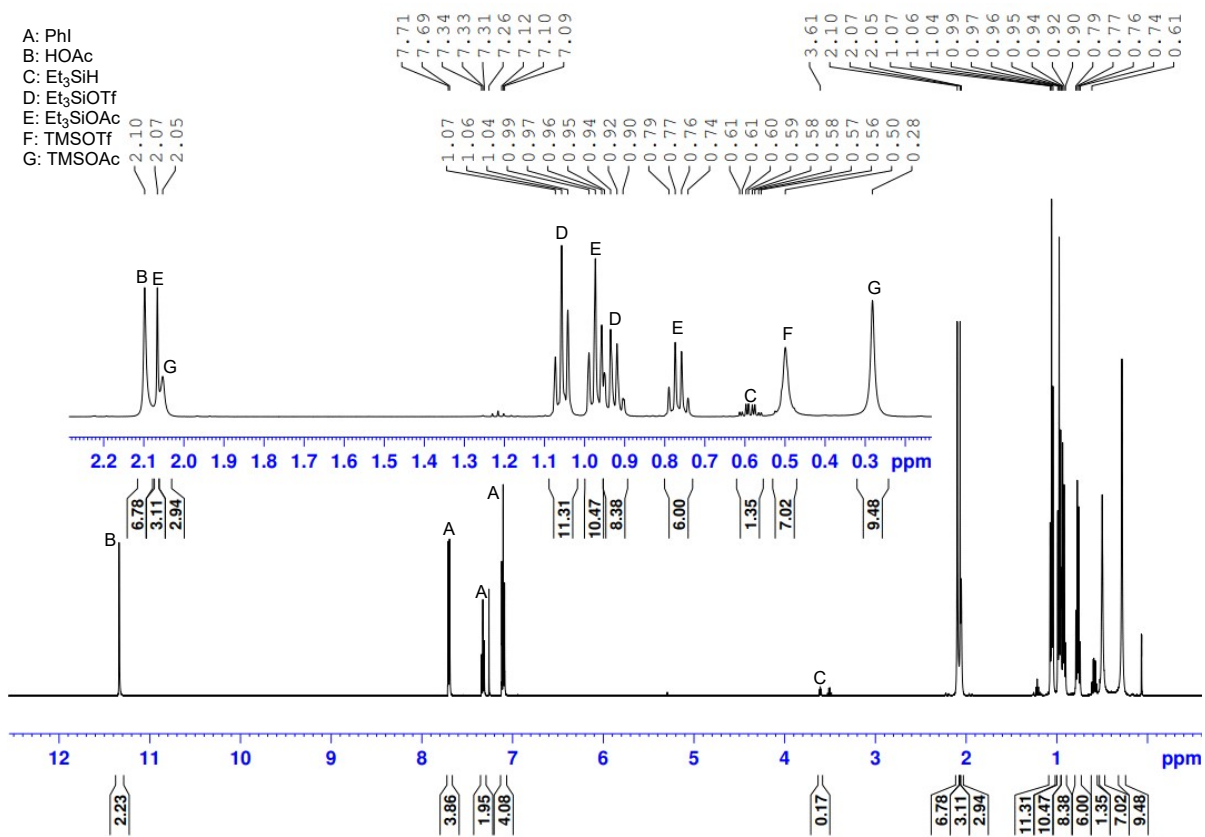

Figure S 6: <sup>1</sup>H NMR of PhI(OAc)(OTf) with Et<sub>3</sub>SiH in CDCl<sub>3</sub> (reaction time ~ 15 min)

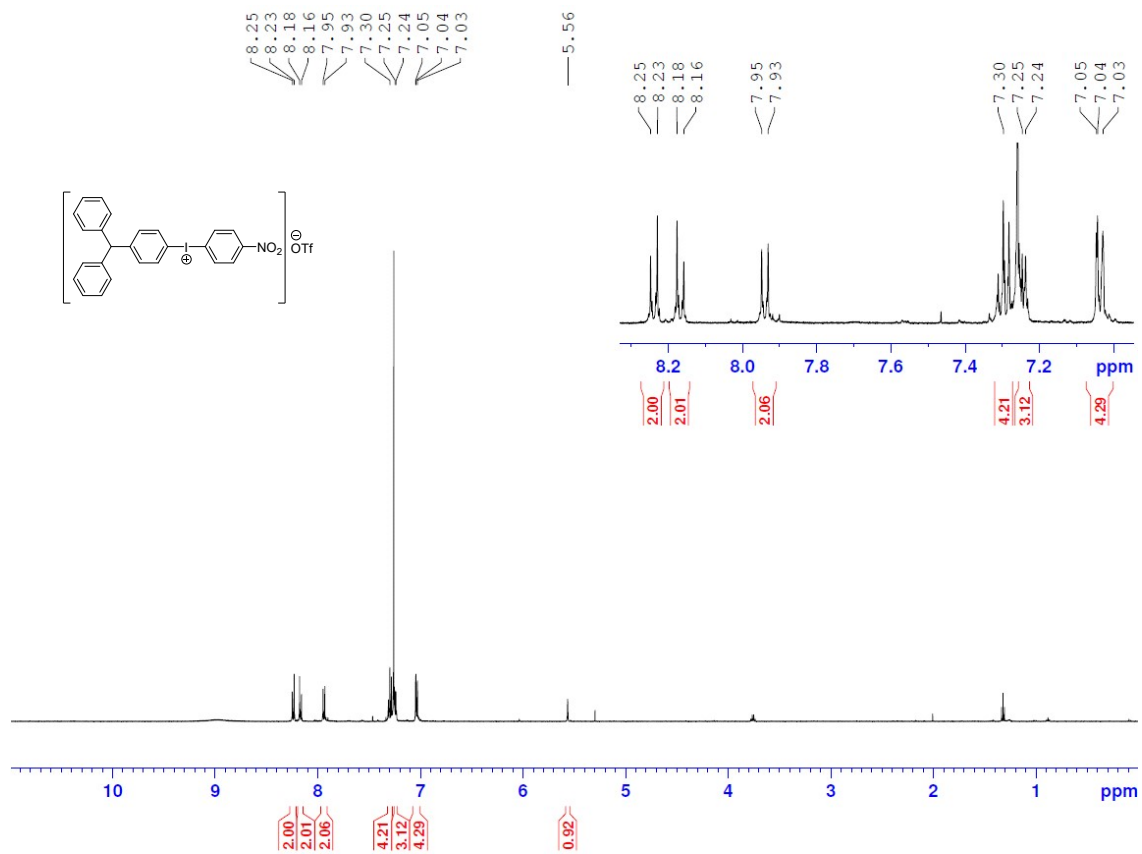

Figure S 7:  $^1\text{H}$  NMR of  $\text{NO}_2\text{-C}_6\text{H}_4\text{-I}(\text{OTf})_2$  with  $\text{Ph}_3\text{CH}$  in  $\text{CDCl}_3$

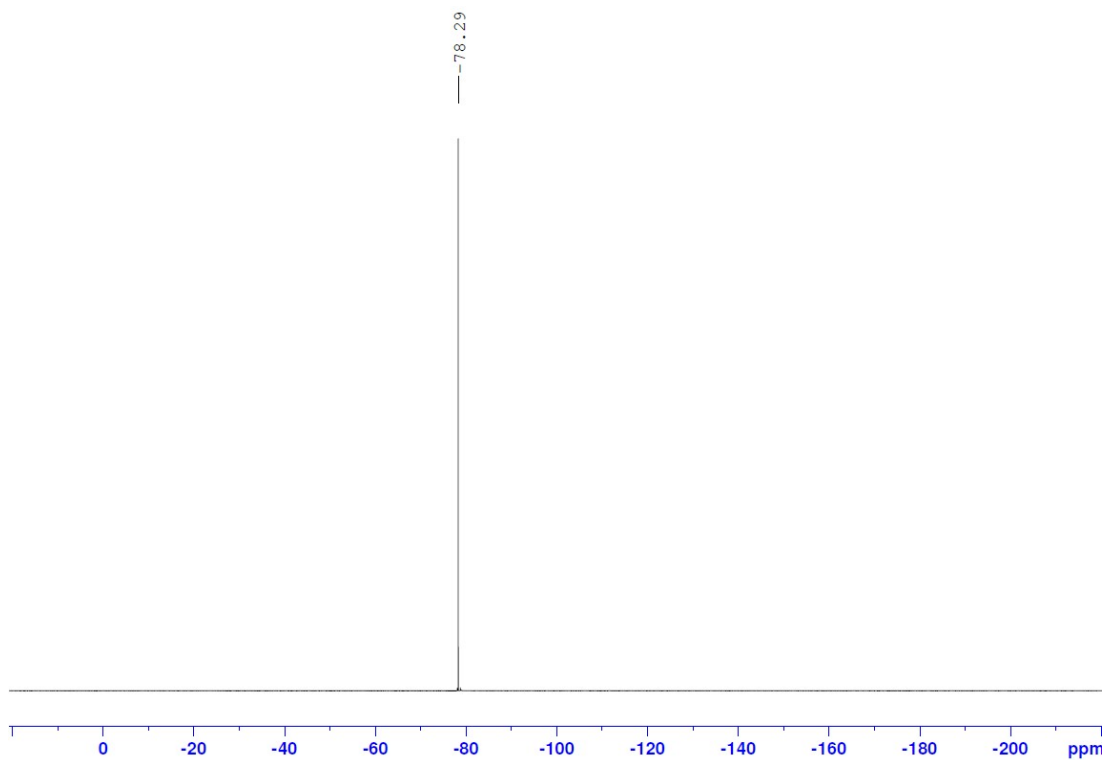

Figure S 8:  $^{19}\text{F}$  NMR of  $\text{NO}_2\text{-C}_6\text{H}_4\text{-I}(\text{OTf})_2$  with  $\text{Ph}_3\text{CH}$  in  $\text{CDCl}_3$

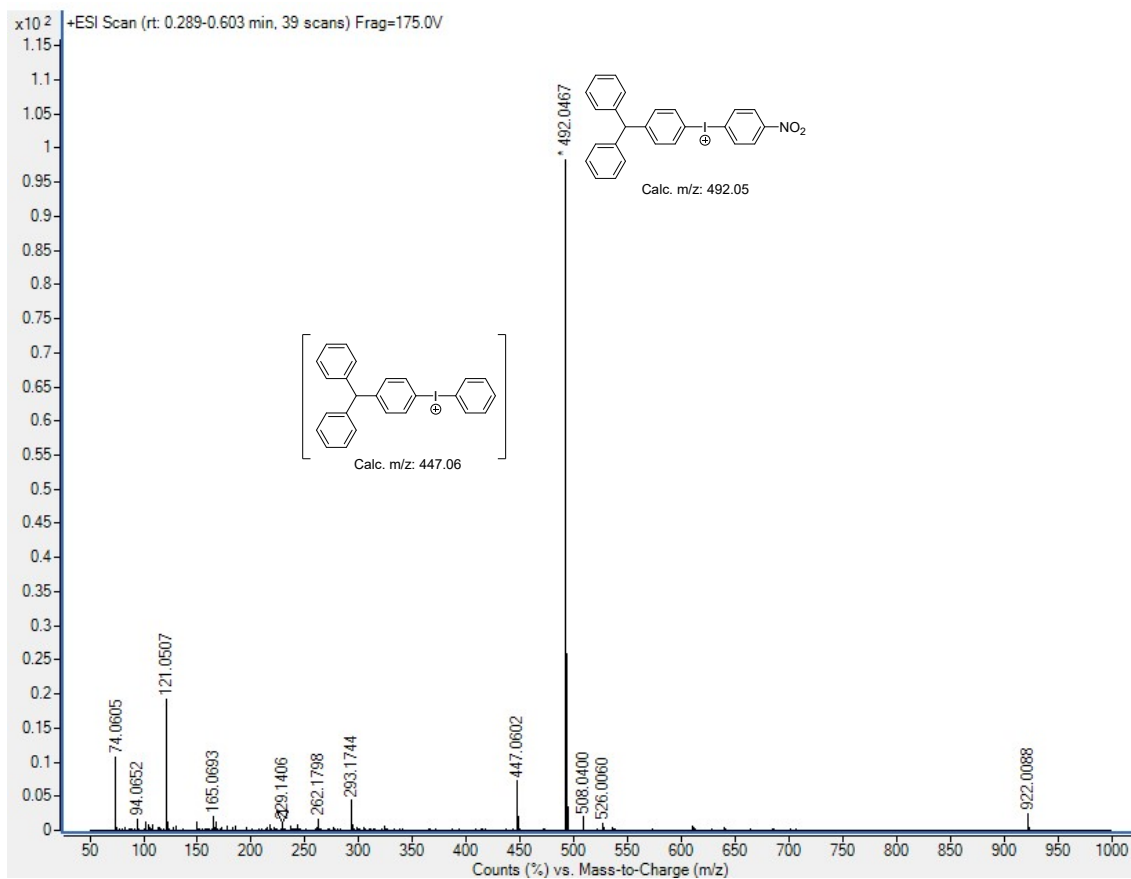

Figure S 9: HRMS of  $\text{NO}_2\text{-C}_6\text{H}_4\text{-I}(\text{OTf})_2$  with  $\text{Ph}_3\text{CH}$

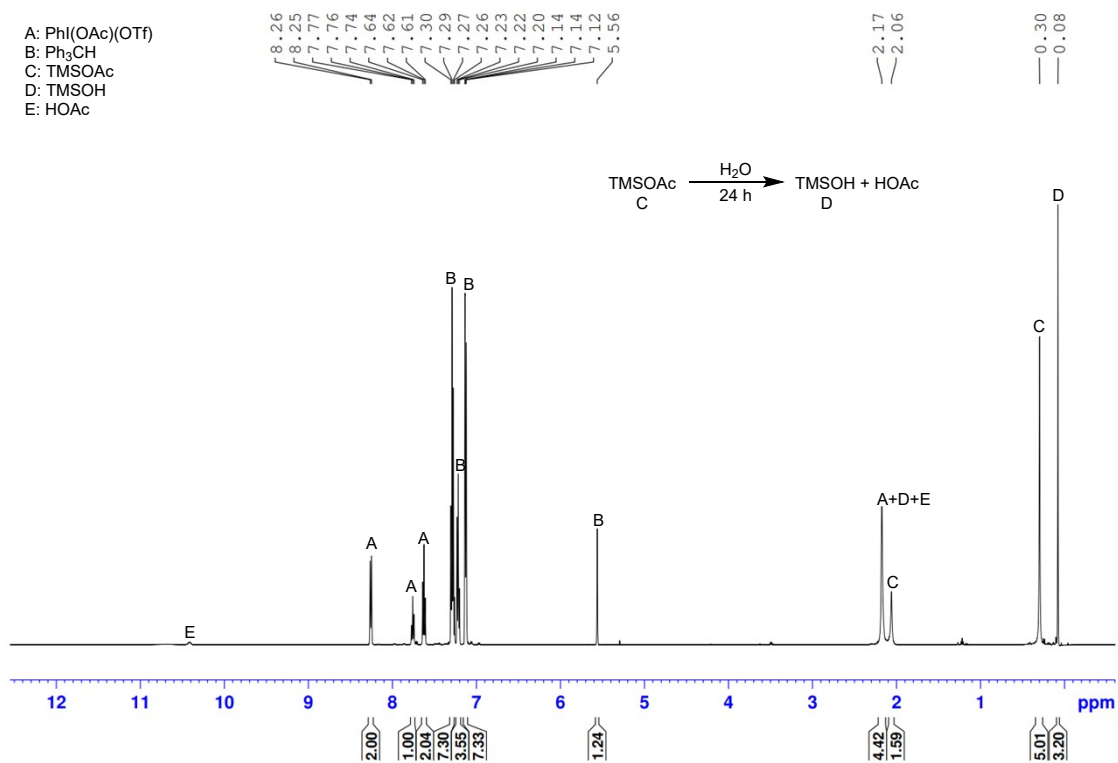

Figure S 10:  $^1\text{H}$  NMR of  $\text{PhI}(\text{OAc})(\text{OTf})$  with  $\text{Ph}_3\text{CH}$  in  $\text{CDCl}_3$  (reaction time  $\sim 17$  h)

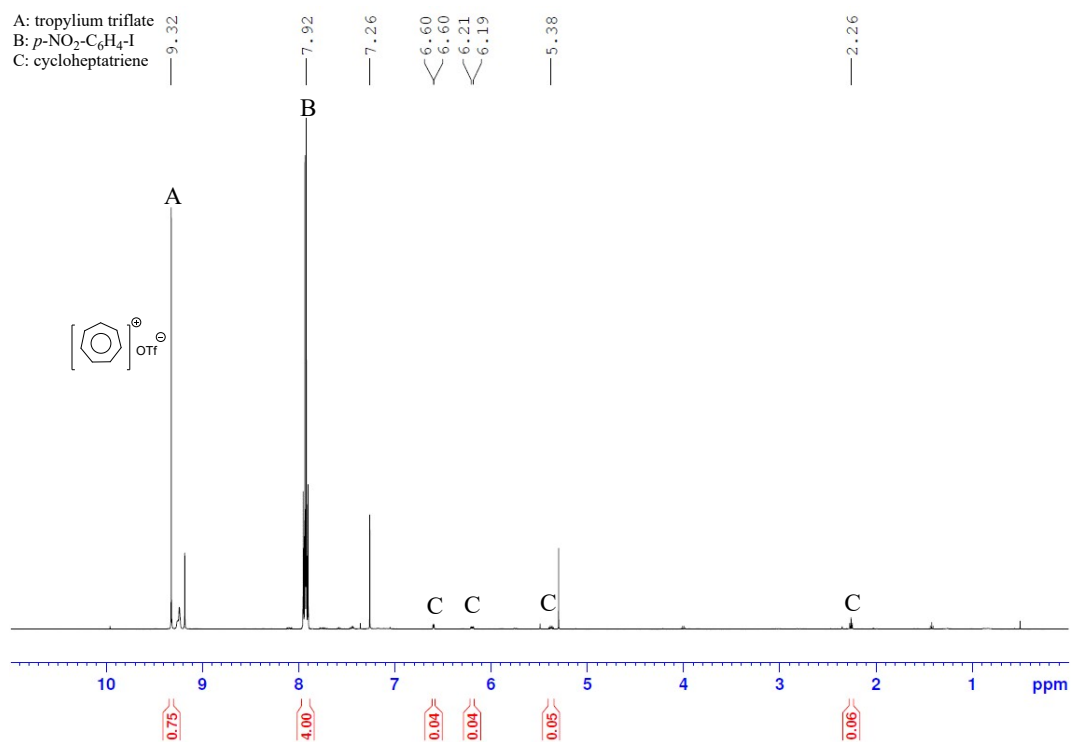

Figure S 11: <sup>1</sup>H NMR of NO<sub>2</sub>-C<sub>6</sub>H<sub>4</sub>-I(OTf)<sub>2</sub> with cycloheptatriene in CDCl<sub>3</sub>

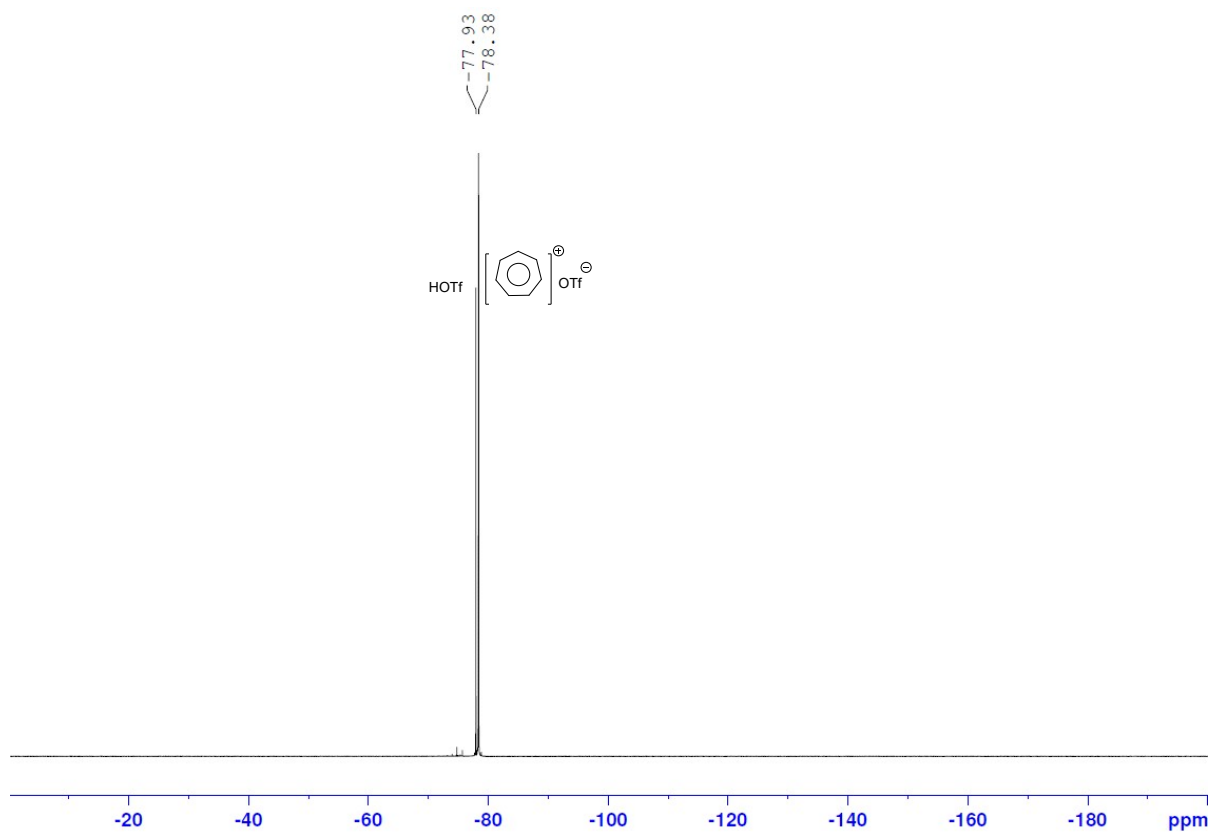

Figure S 12: <sup>19</sup>F NMR of NO<sub>2</sub>-C<sub>6</sub>H<sub>4</sub>-I(OTf)<sub>2</sub> with cycloheptatriene in CDCl<sub>3</sub>



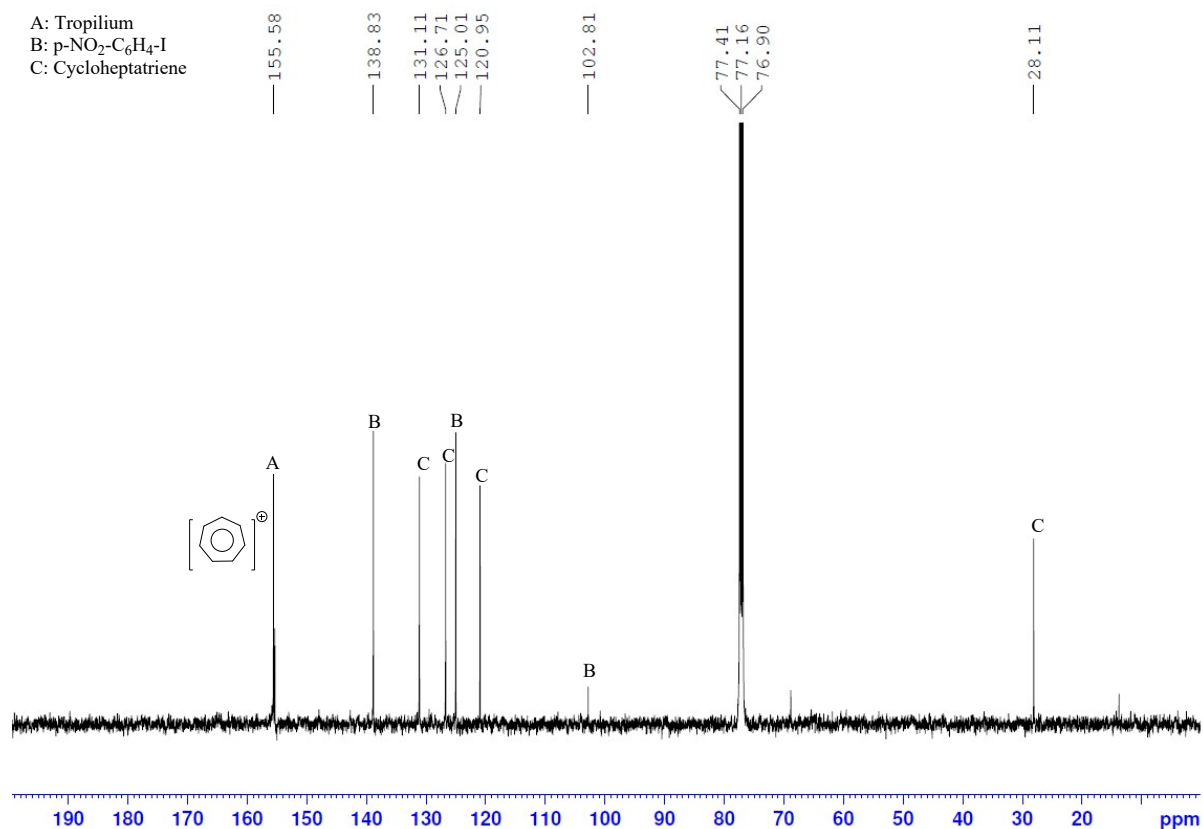

Figure S 13: <sup>13</sup>C NMR of NO<sub>2</sub>-C<sub>6</sub>H<sub>4</sub>-I(OTf)<sub>2</sub> with cycloheptatriene in CDCl<sub>3</sub>

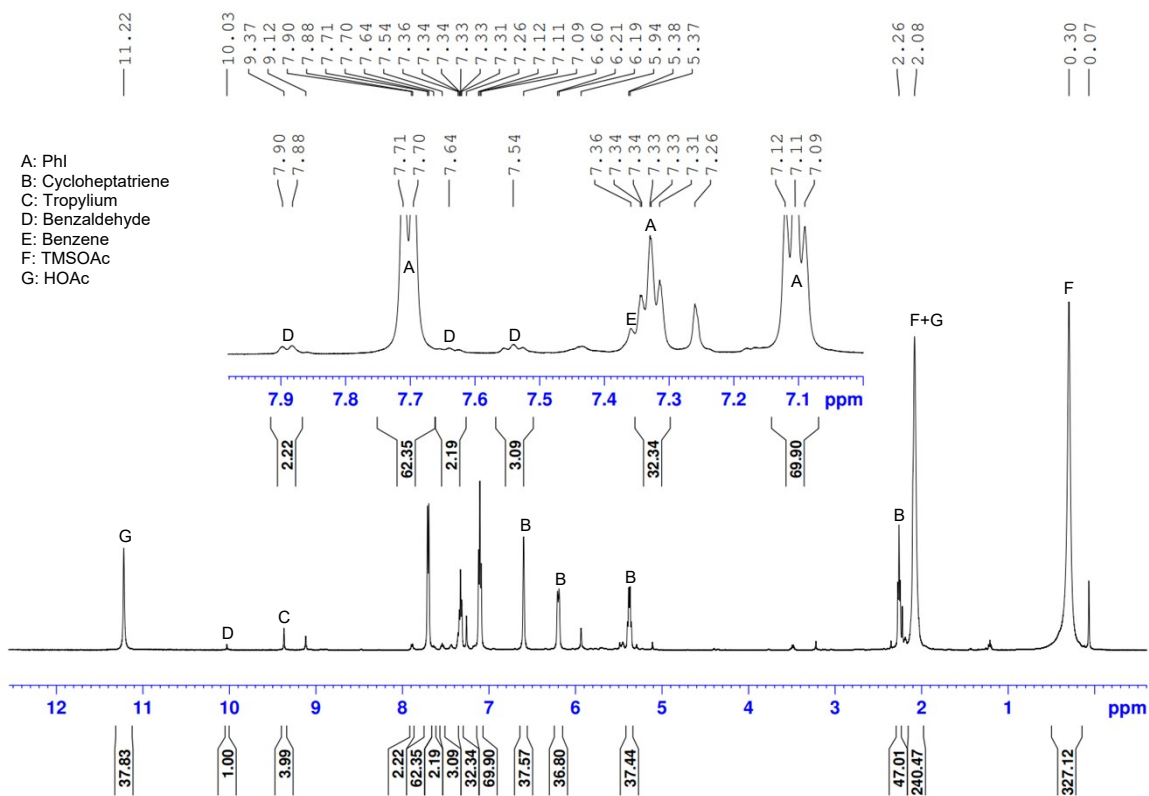

Figure S 14: <sup>1</sup>H NMR of PhI(OAc)(OTf) with cycloheptatriene in CDCl<sub>3</sub> (reaction time ~ 15 min)

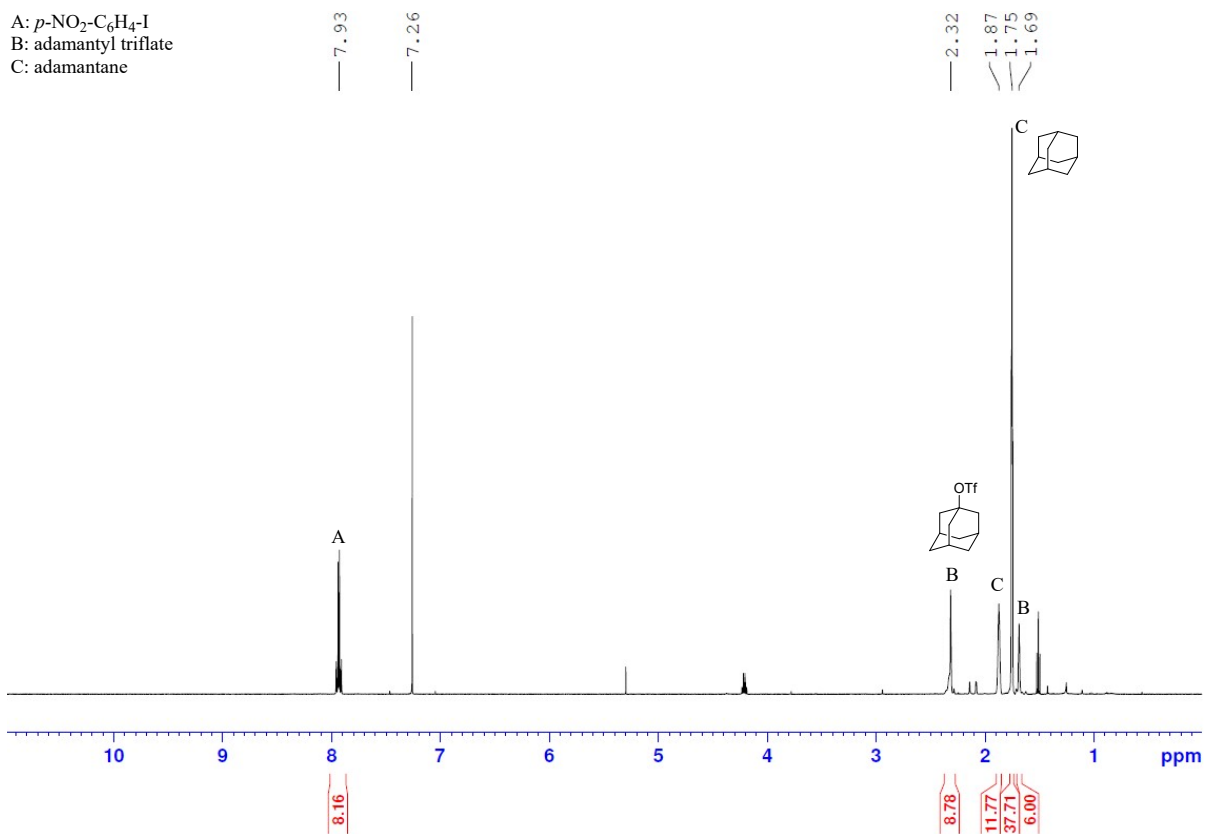

Figure S 15:  $^1\text{H}$  NMR of  $\text{NO}_2\text{-C}_6\text{H}_4\text{-I}(\text{OTf})_2$  with adamantane in  $\text{CDCl}_3$

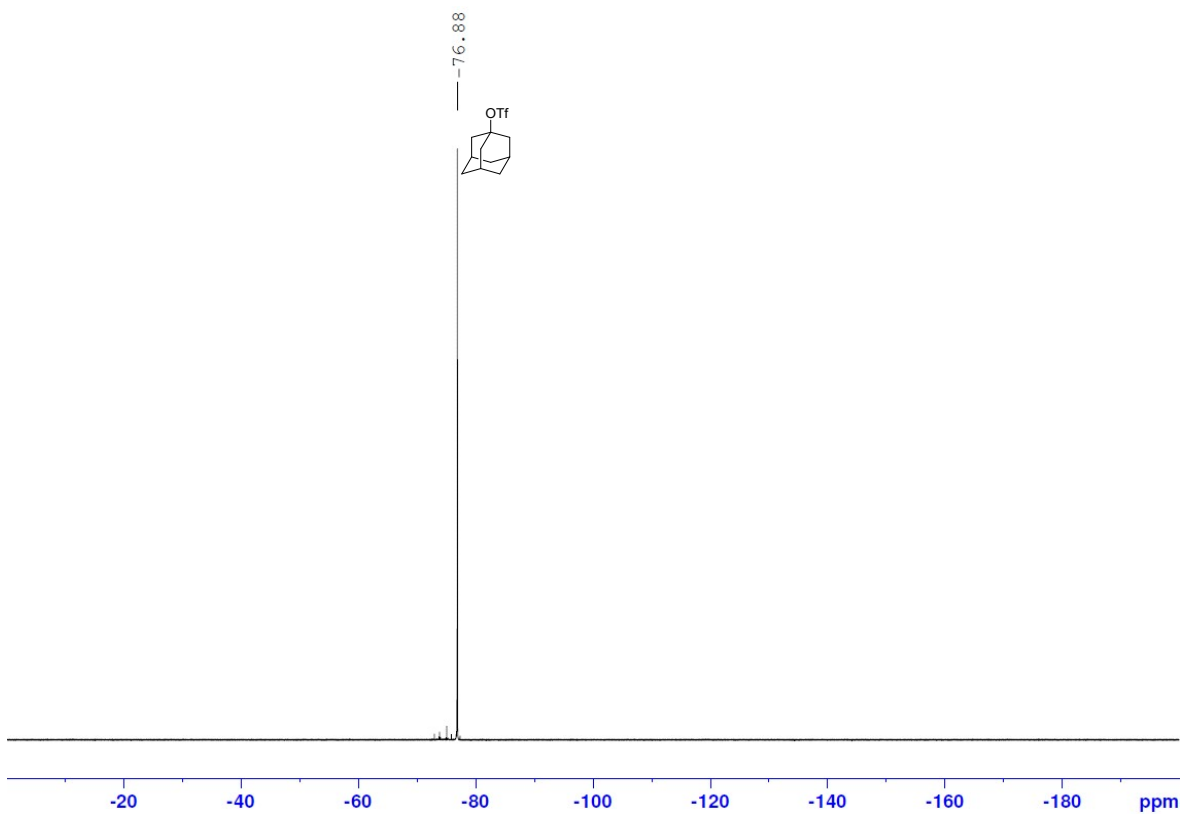

Figure S 16:  $^{19}\text{F}$  NMR of  $\text{NO}_2\text{-C}_6\text{H}_4\text{-I}(\text{OTf})_2$  with adamantane in  $\text{CDCl}_3$

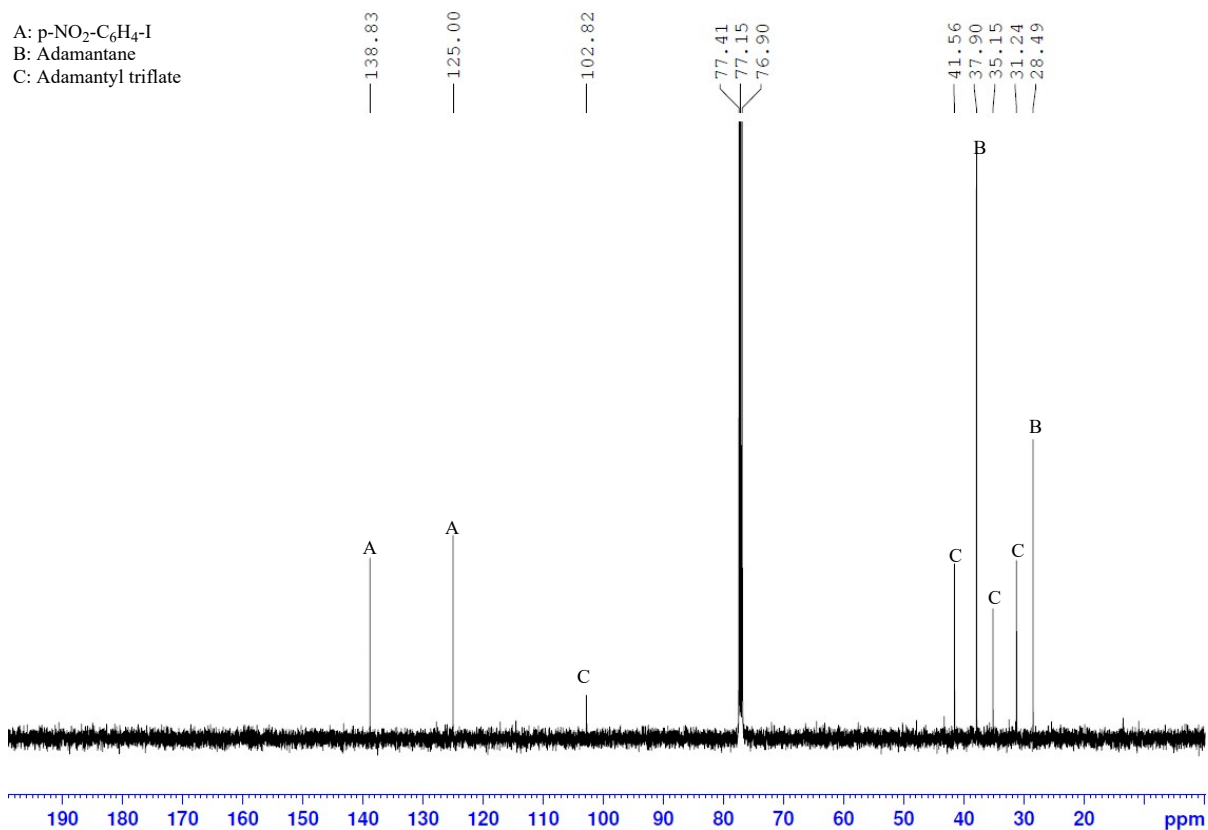

Figure S 17:  $^{13}\text{C}$  NMR of  $\text{NO}_2\text{-C}_6\text{H}_4\text{-I(OTf)}_2$  with adamantane in  $\text{CDCl}_3$

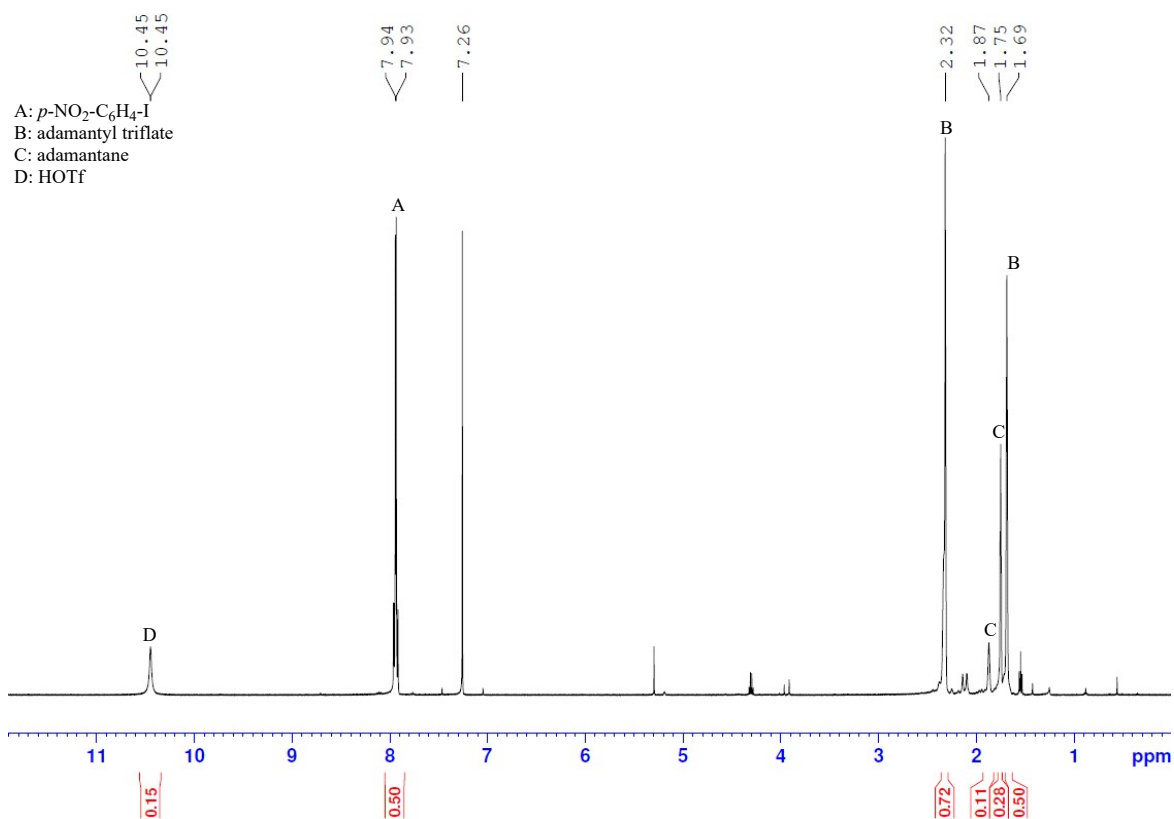

Figure S 18:  $^1\text{H}$  NMR of  $\text{NO}_2\text{-C}_6\text{H}_4\text{-I(OTf)}_2$  with adamantane at  $60\text{ }^\circ\text{C}$  in  $\text{CDCl}_3$

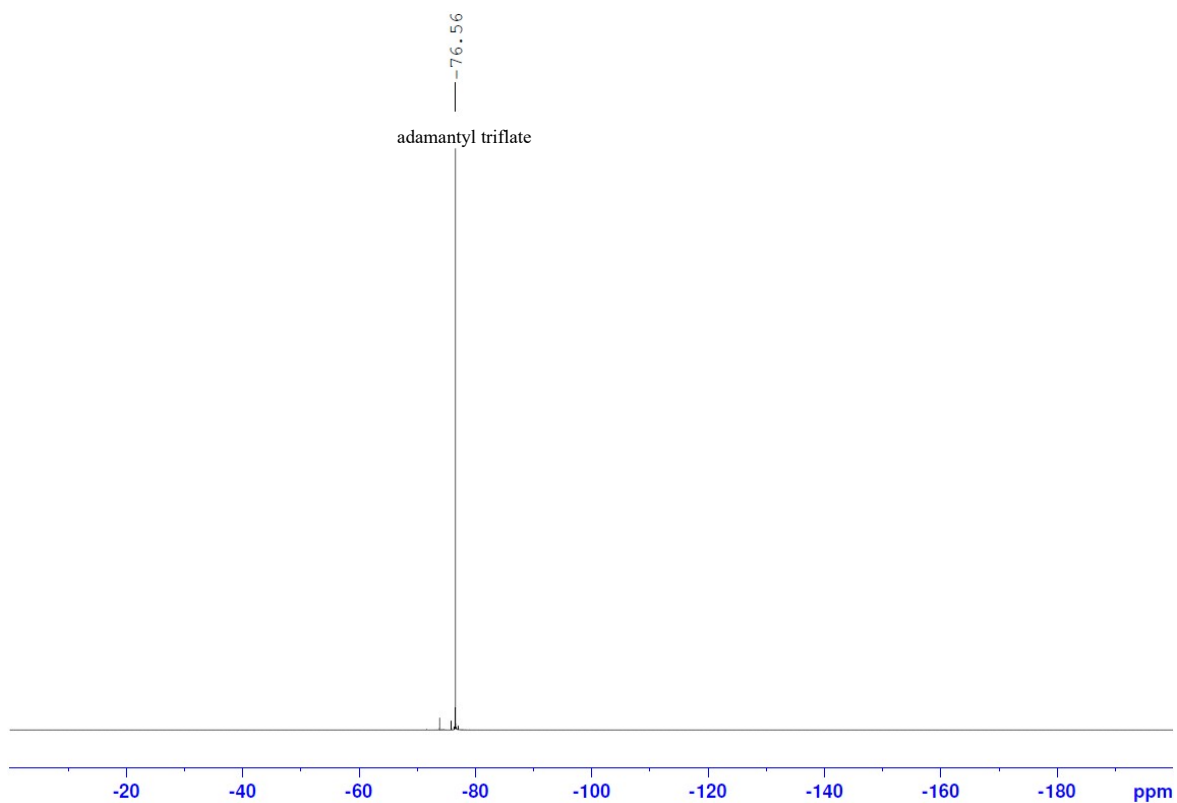

Figure S 19:  $^{19}\text{F}$  NMR of  $\text{NO}_2\text{-C}_6\text{H}_4\text{-I}(\text{OTf})_2$  with adamantane at  $60\text{ }^\circ\text{C}$  in  $\text{CDCl}_3$

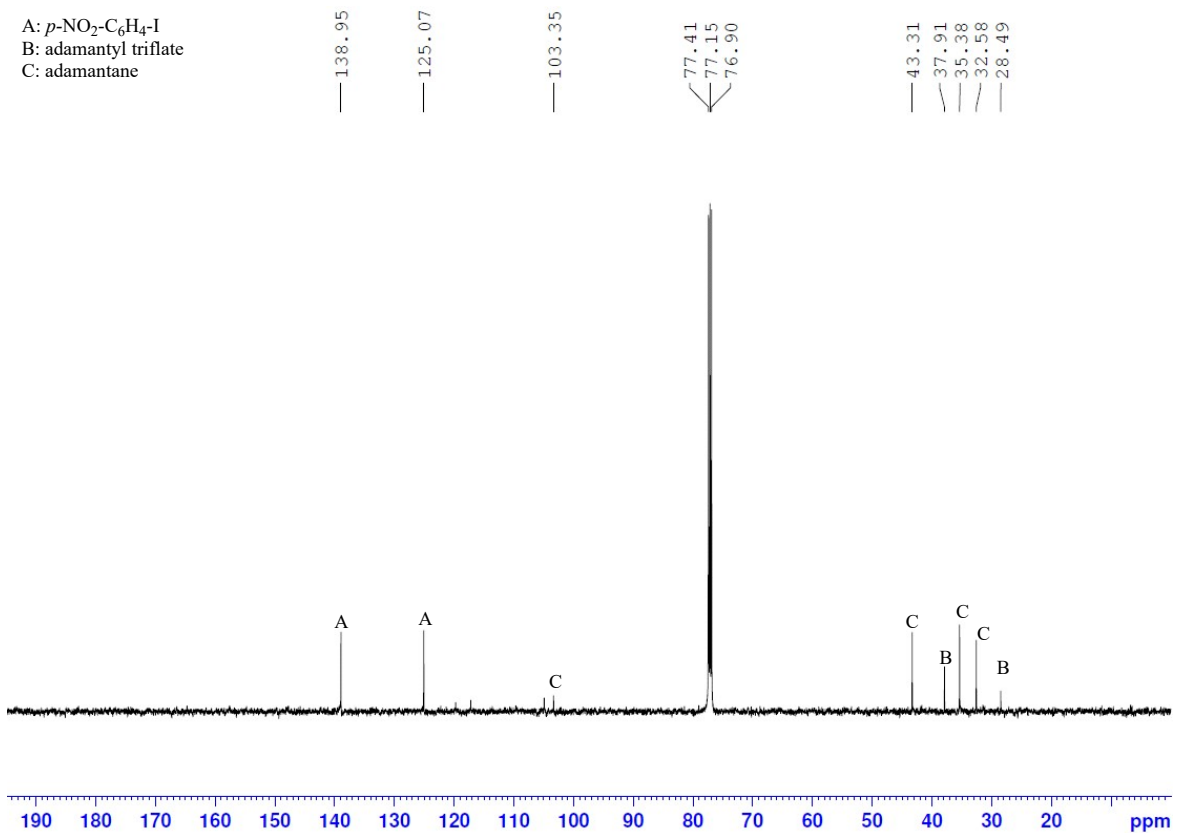

Figure S 20:  $^{13}\text{C}$  NMR of  $\text{NO}_2\text{-C}_6\text{H}_4\text{-I}(\text{OTf})_2$  with adamantane at  $60\text{ }^\circ\text{C}$  in  $\text{CDCl}_3$

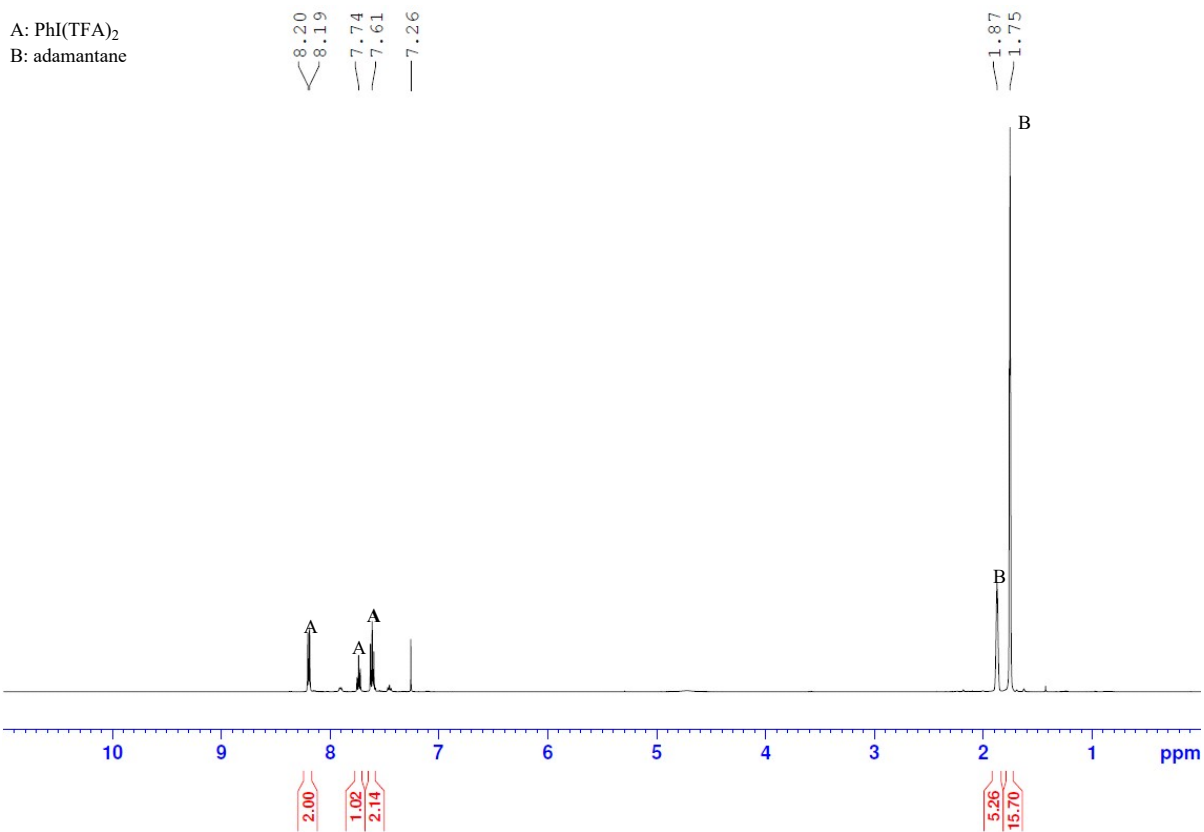

Figure S 21:  $^1\text{H}$  NMR of  $\text{PhI}(\text{TFA})_2$  with adamantane in  $\text{CDCl}_3$  (reaction time  $\sim 17$  h)

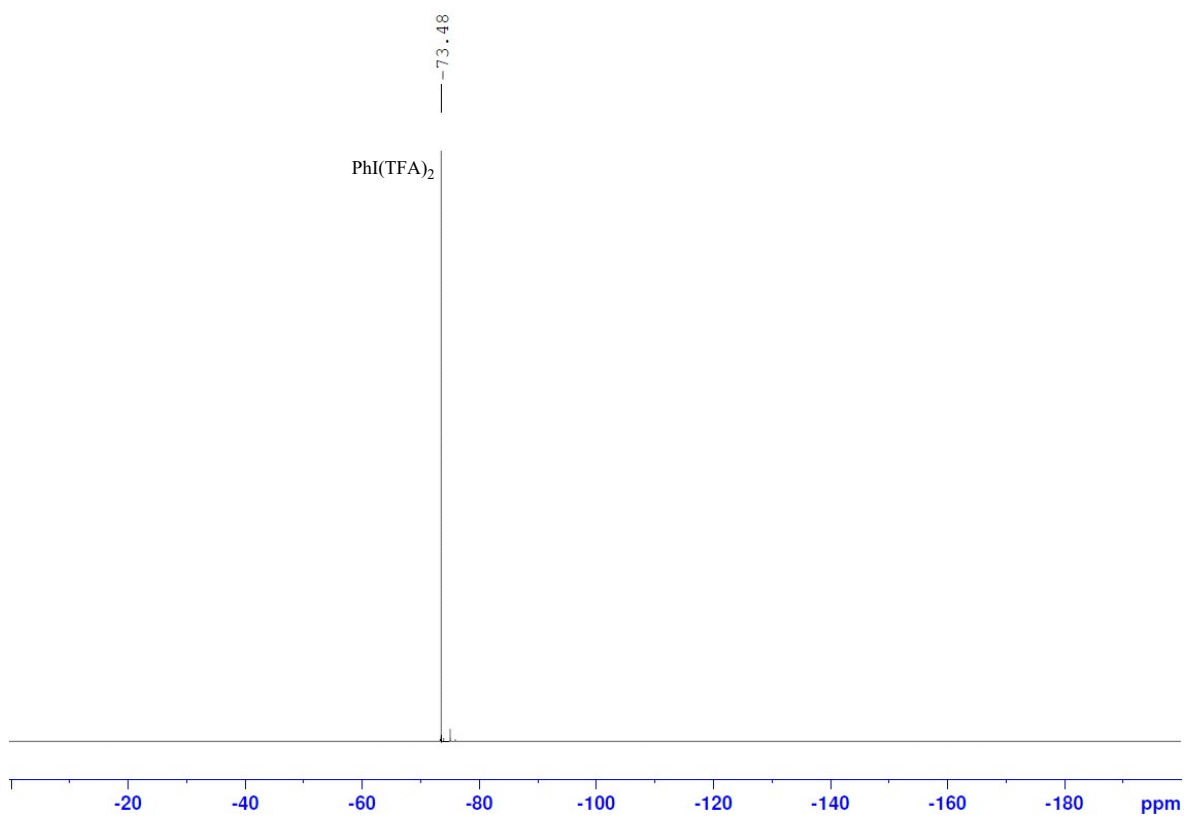

Figure S 22:  $^{19}\text{F}$  NMR of  $\text{PhI}(\text{TFA})_2$  with adamantane in  $\text{CDCl}_3$  (reaction time  $\sim 17$  h)

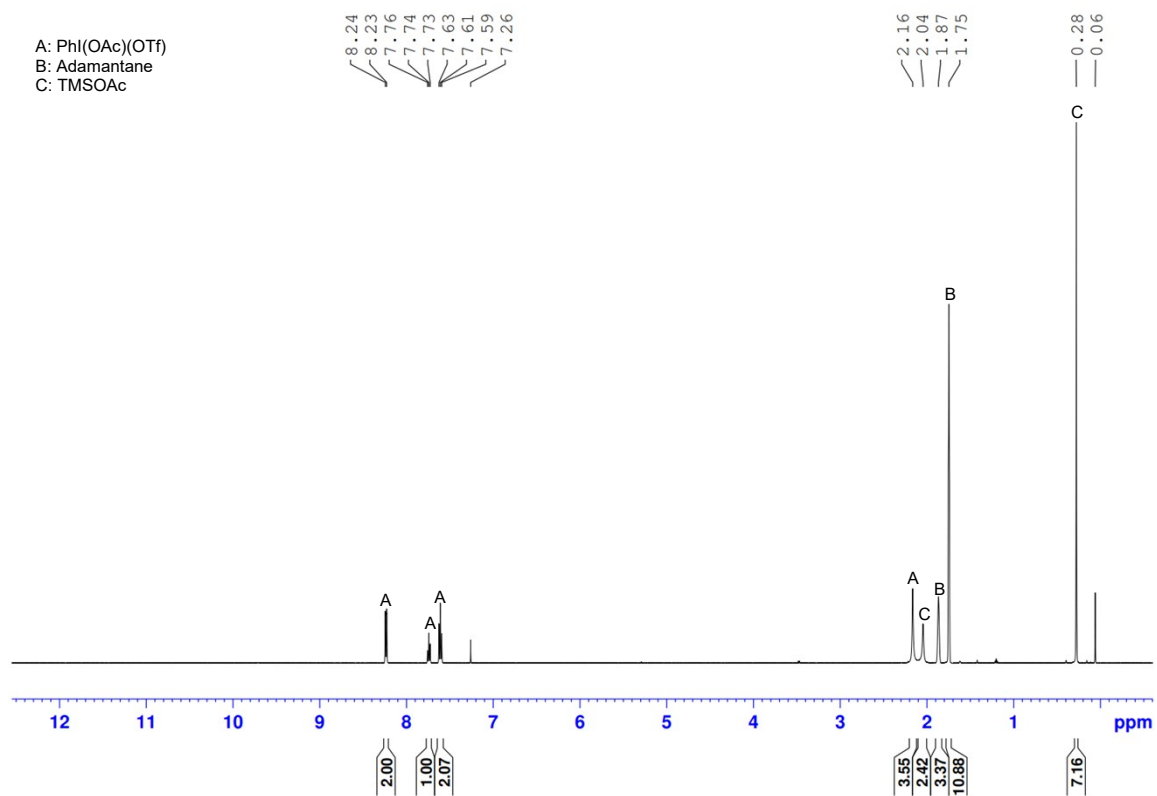

Figure S 23:  $^1\text{H}$  NMR of  $\text{PhI}(\text{OAc})(\text{OTf})$  with adamantane in  $\text{CDCl}_3$  (reaction time  $\sim 17$  h)

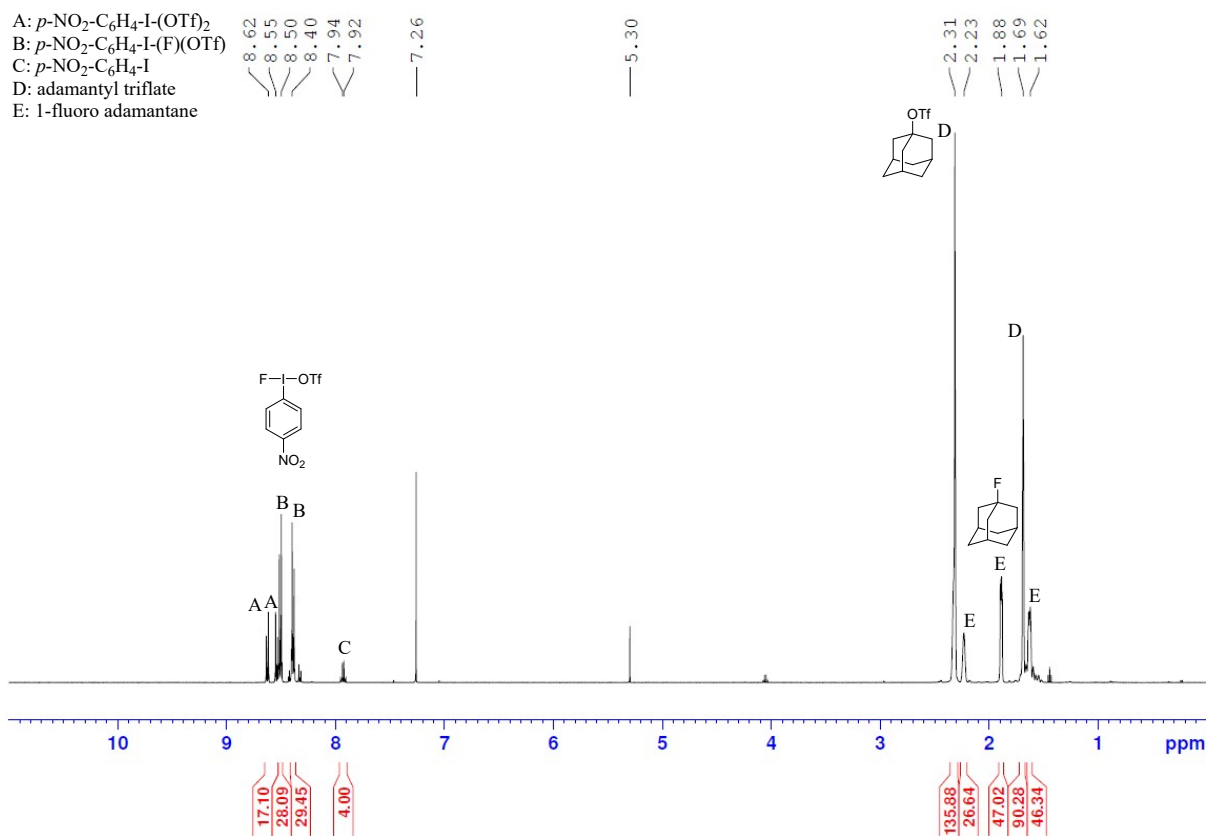

Figure S 24:  $^1\text{H}$  NMR of  $\text{NO}_2\text{-C}_6\text{H}_4\text{-I}(\text{OTf})_2$  with 1-fluoro adamantane in  $\text{CDCl}_3$

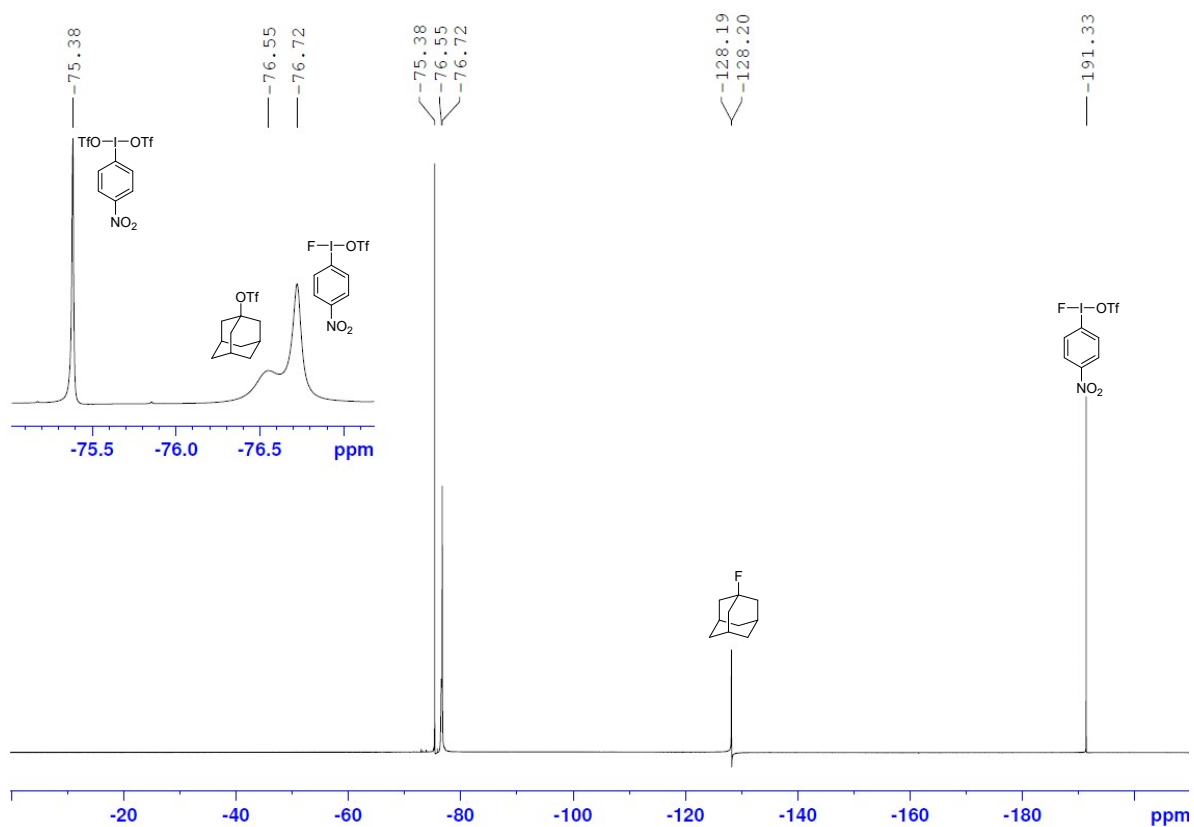

Figure S 25:  $^{19}\text{F}$  NMR of  $\text{NO}_2\text{-C}_6\text{H}_4\text{-I}(\text{OTf})_2$  with 1-fluoro adamantane in  $\text{CDCl}_3$

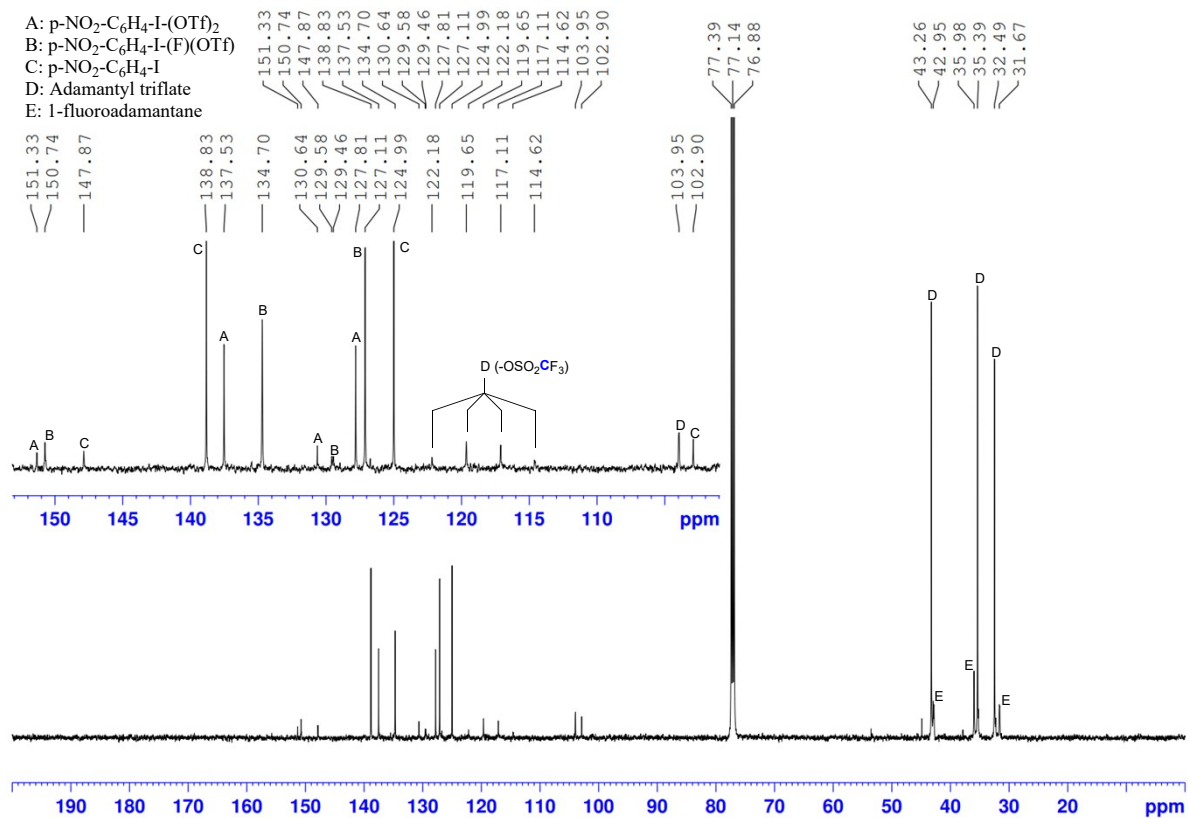

Figure S 26:  $^{13}\text{C}$  NMR of  $\text{NO}_2\text{-C}_6\text{H}_4\text{-I}(\text{OTf})_2$  with 1-fluoro adamantane in  $\text{CDCl}_3$



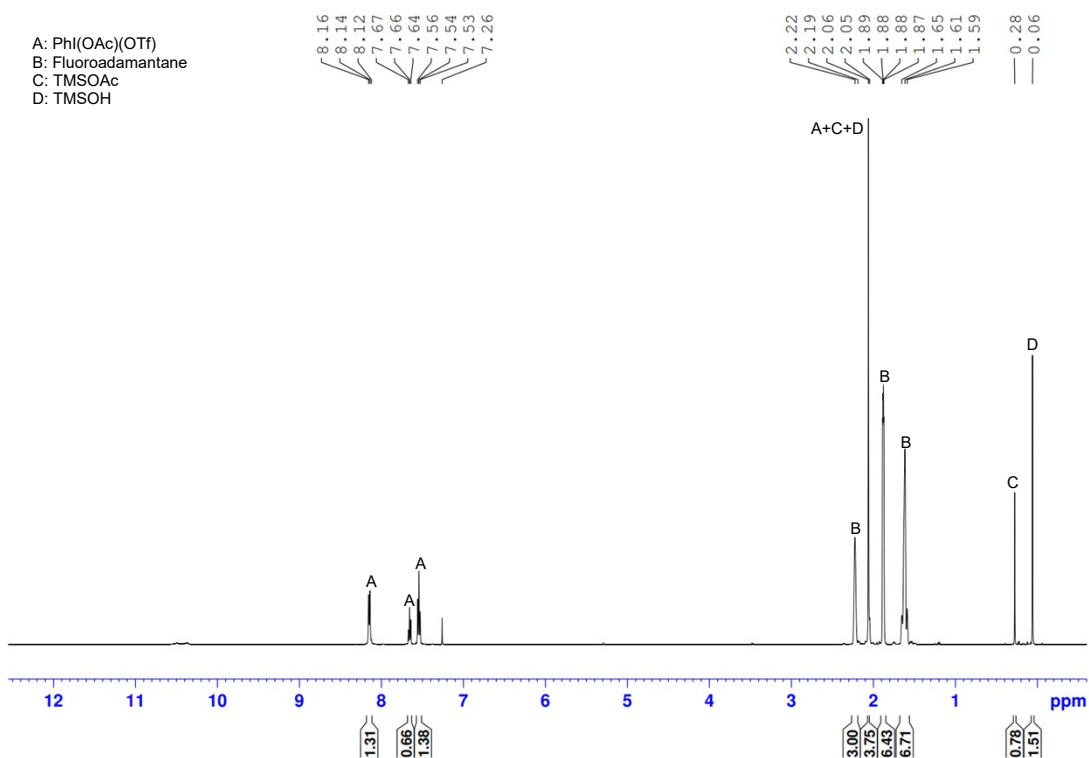

Figure S 27:  $^1\text{H}$  NMR of  $\text{PhI}(\text{OAc})(\text{OTf})$  with 1-fluoro adamantane in  $\text{CDCl}_3$  (reaction time  $\sim 17$  h)

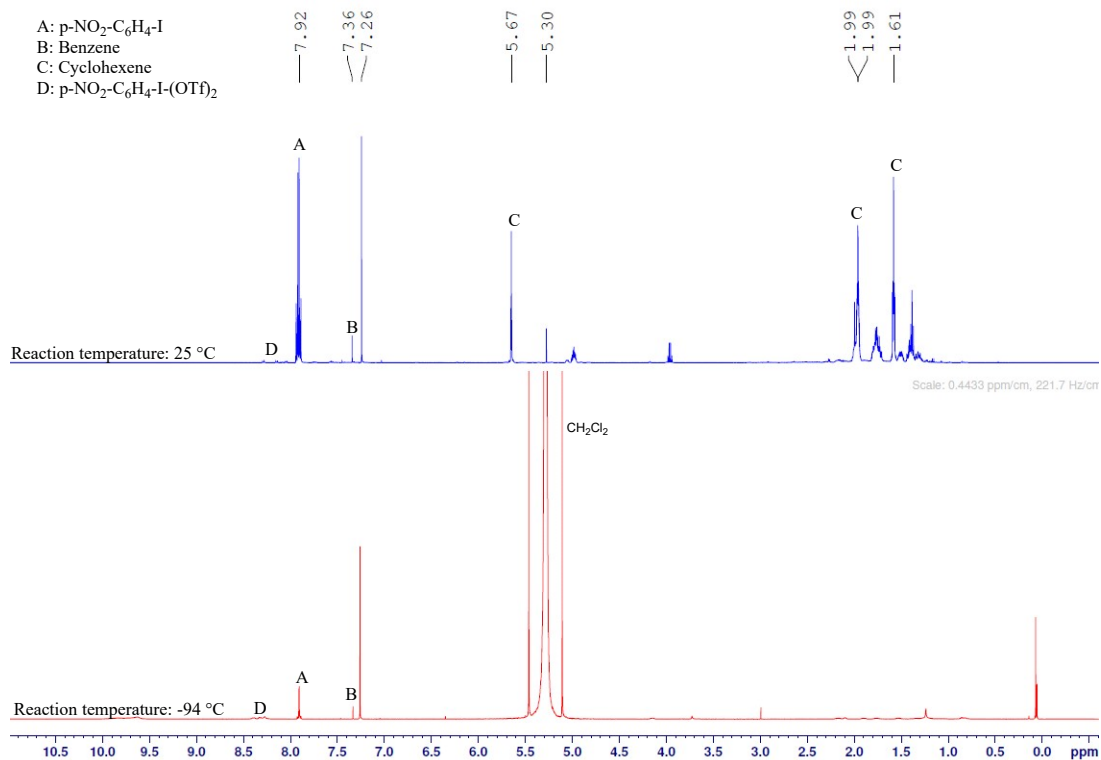

Figure S 28:  $^1\text{H}$  NMR spectrum stack of reaction of  $\text{NO}_2\text{-C}_6\text{H}_4\text{-I}(\text{OTf})_2$  with cyclohexene at different temperatures in  $\text{CDCl}_3$

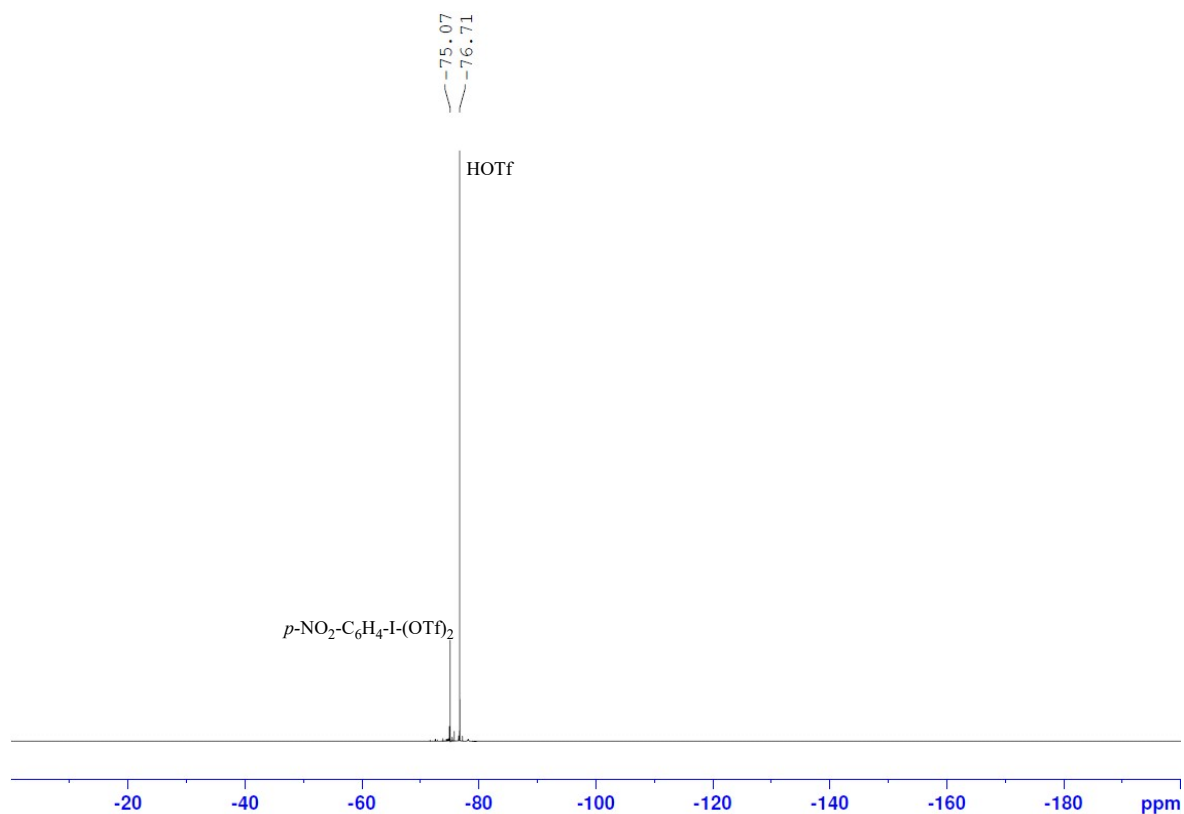

Figure S 29:  $^{19}\text{F}$  NMR of  $\text{NO}_2\text{-C}_6\text{H}_4\text{-I(OTf)}_2$  with cyclohexene in  $\text{CDCl}_3$

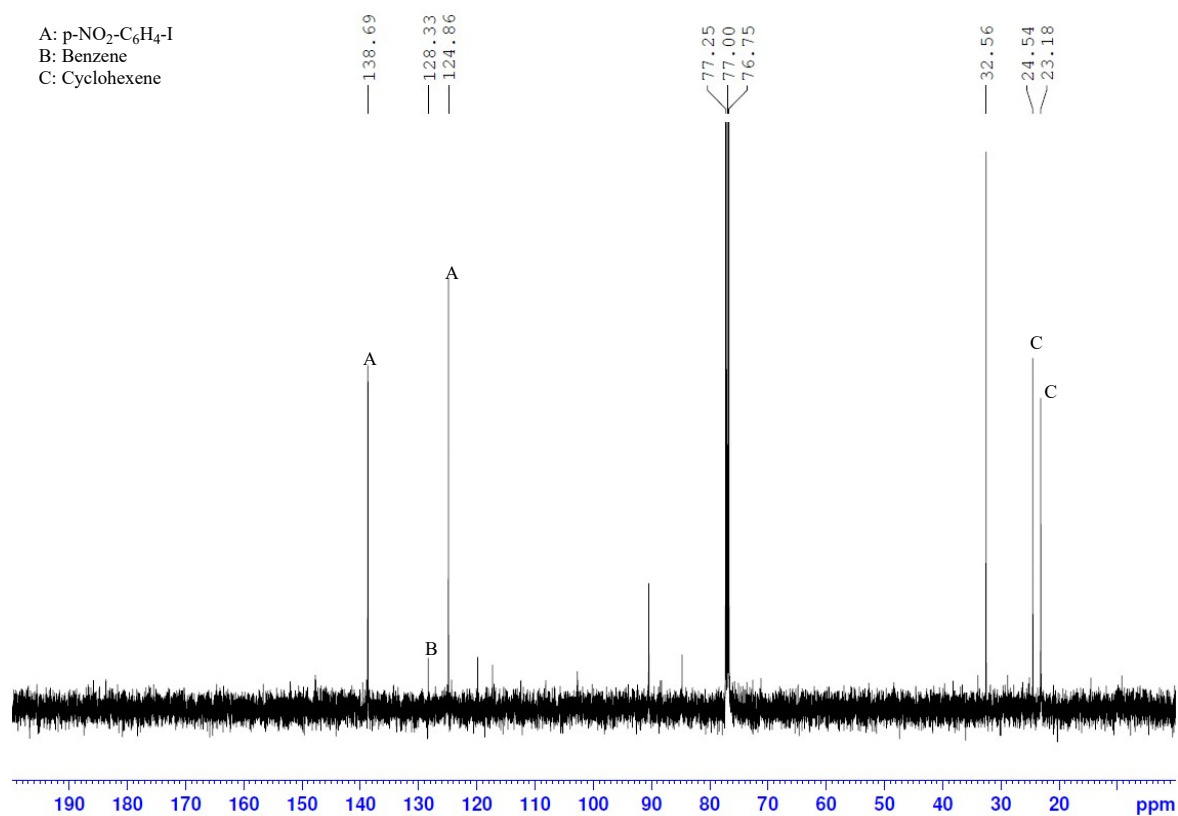

Figure S 30:  $^{13}\text{C}$  NMR of  $\text{NO}_2\text{-C}_6\text{H}_4\text{-I(OTf)}_2$  with cyclohexene in  $\text{CDCl}_3$

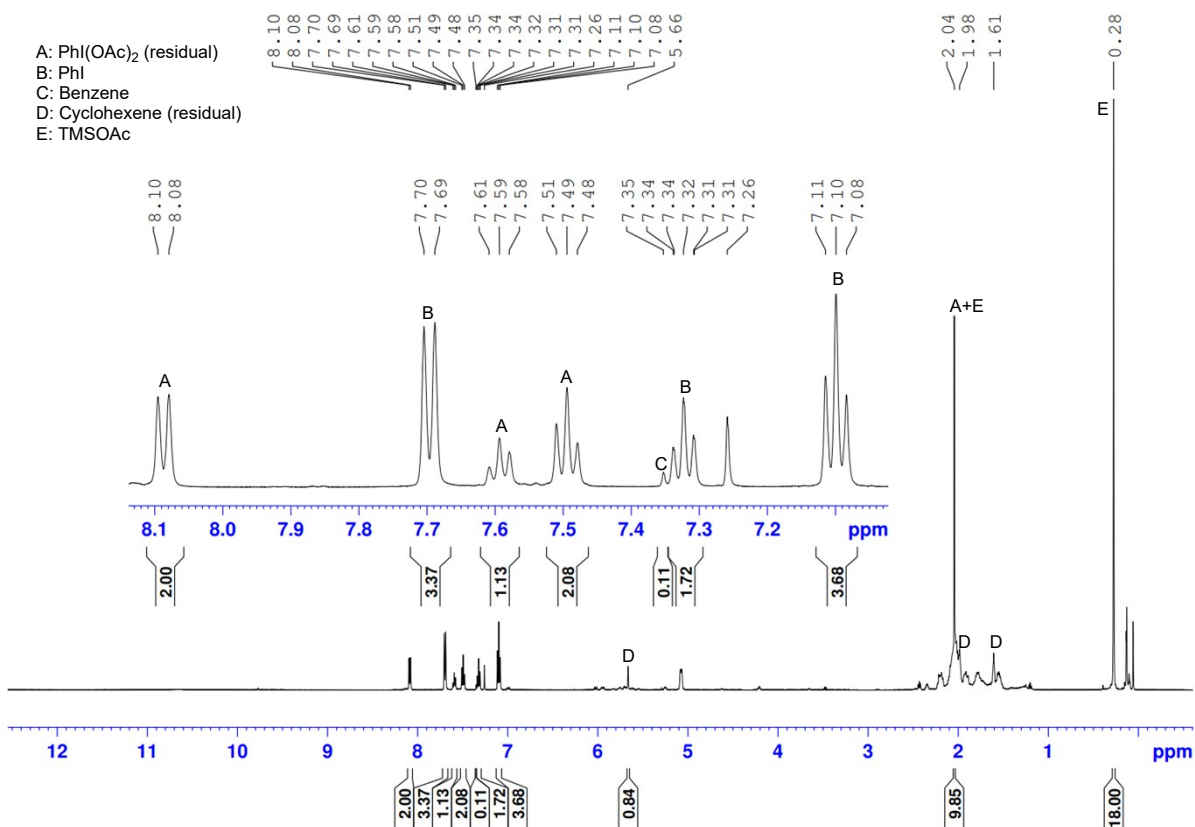

Figure S 31:  $^1\text{H}$  NMR of  $\text{PhI}(\text{OAc})(\text{OTf})$  with cyclohexene in  $\text{CDCl}_3$  (reaction time  $\sim 15$  min)

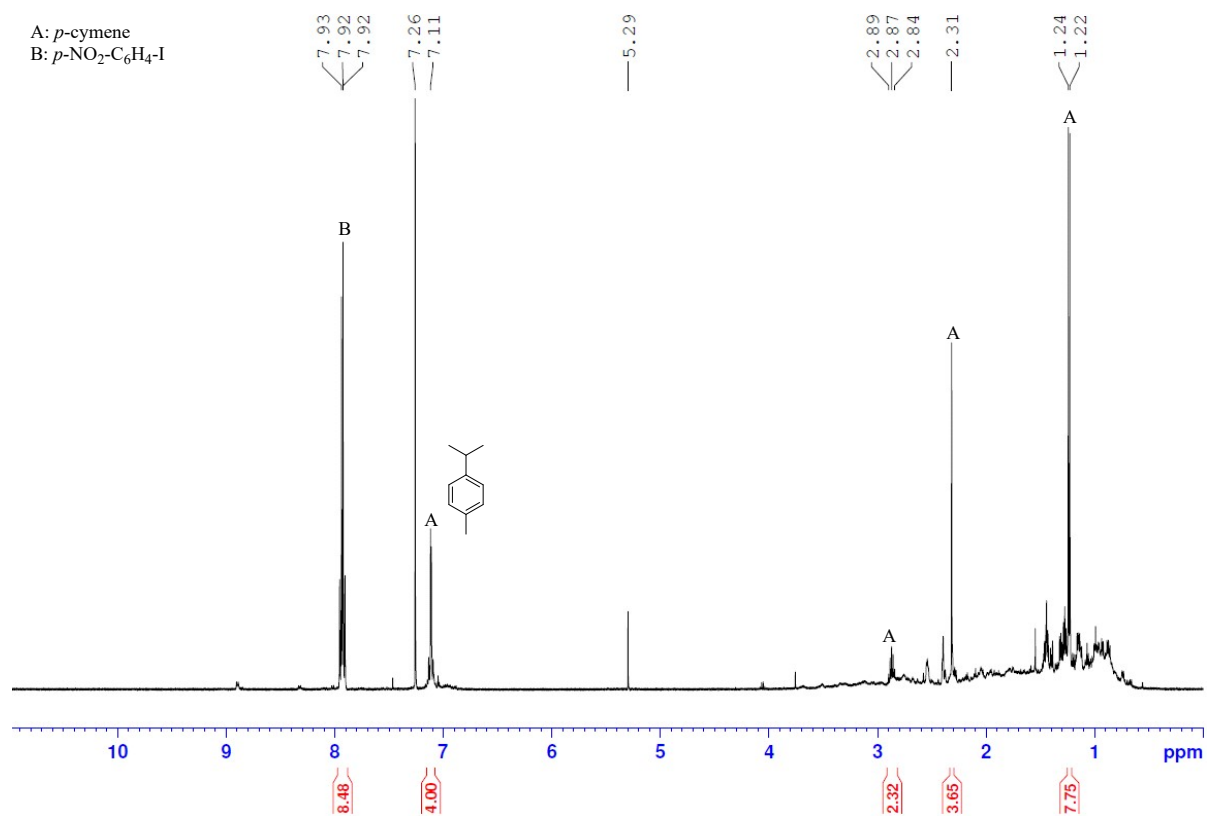

Figure S 32:  $^1\text{H}$  NMR of  $\text{NO}_2\text{-C}_6\text{H}_4\text{-I(OTf)}_2$  with limonene in  $\text{CDCl}_3$

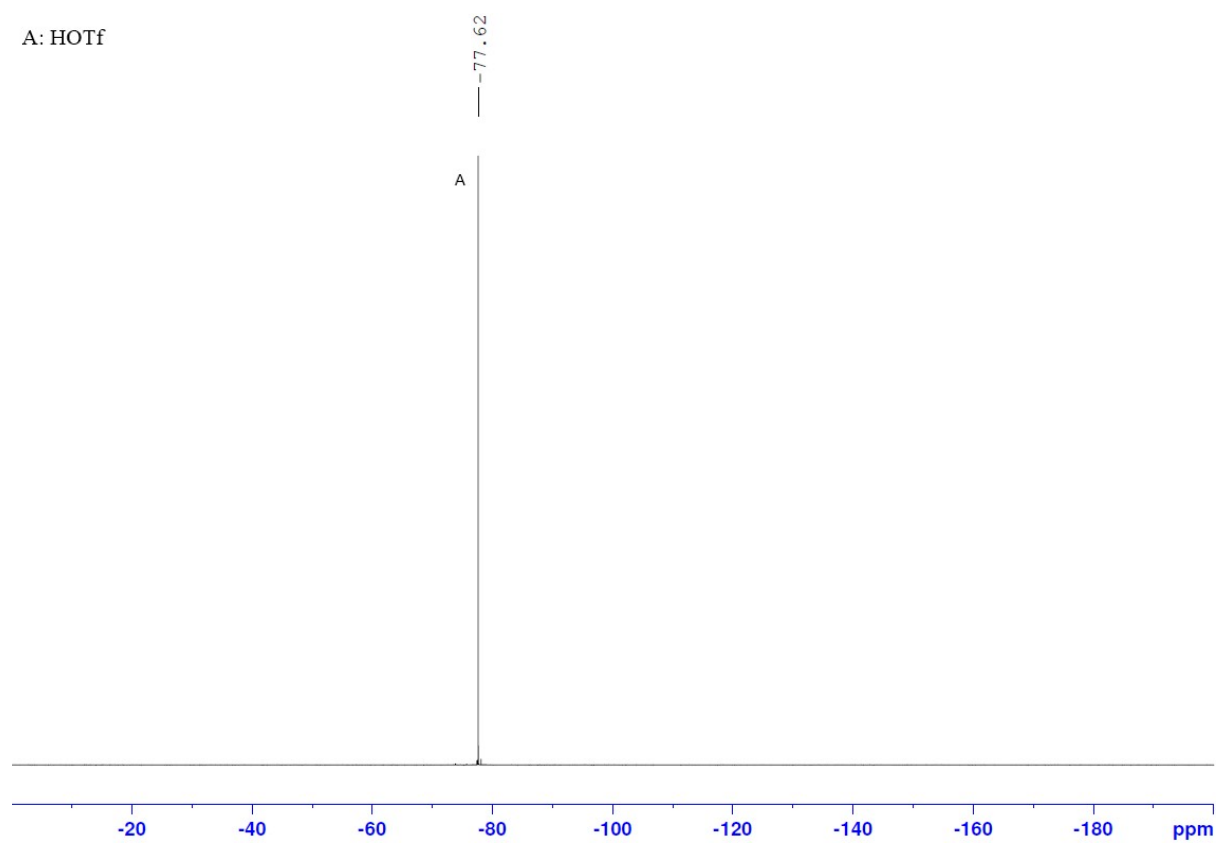

Figure S 33:  $^{19}\text{F}$  NMR of  $\text{NO}_2\text{-C}_6\text{H}_4\text{-I(OTf)}_2$  with limonene in  $\text{CDCl}_3$

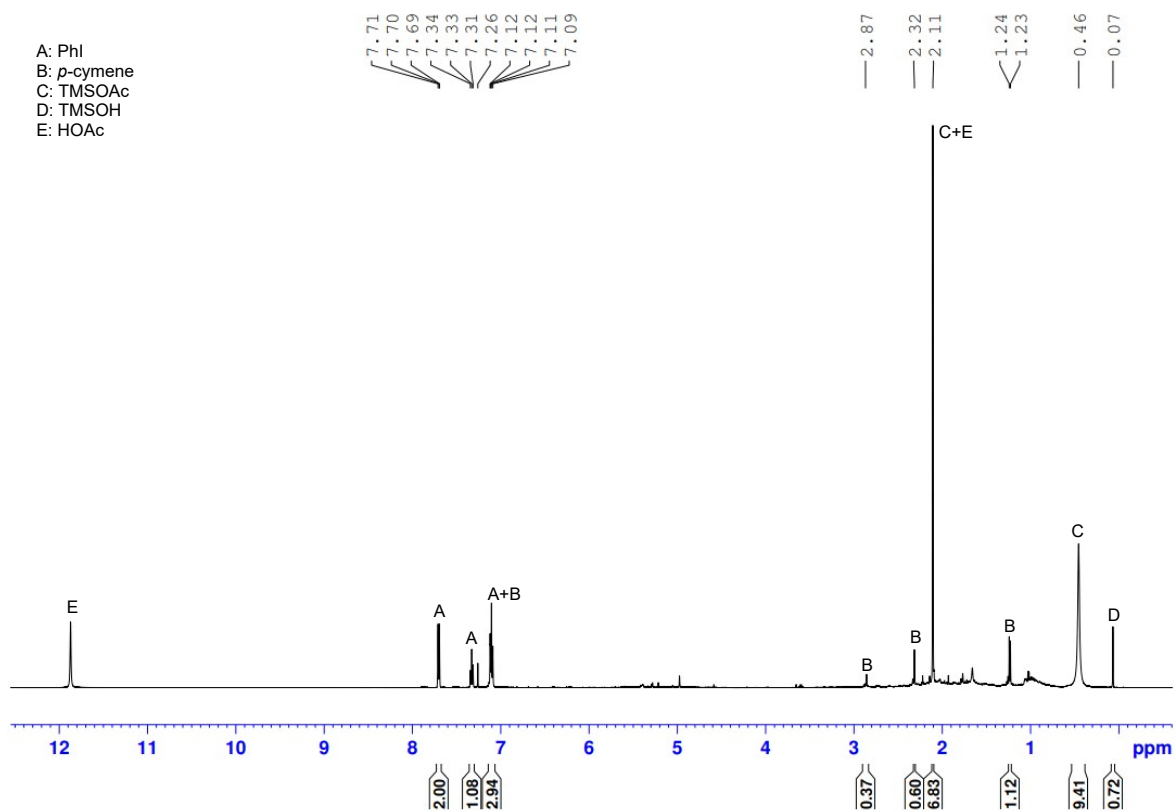

Figure S 34:  $^1\text{H}$  NMR of  $\text{PhI}(\text{OAc})(\text{OTf})$  with limonene in  $\text{CDCl}_3$  (reaction time  $\sim 15$  min)

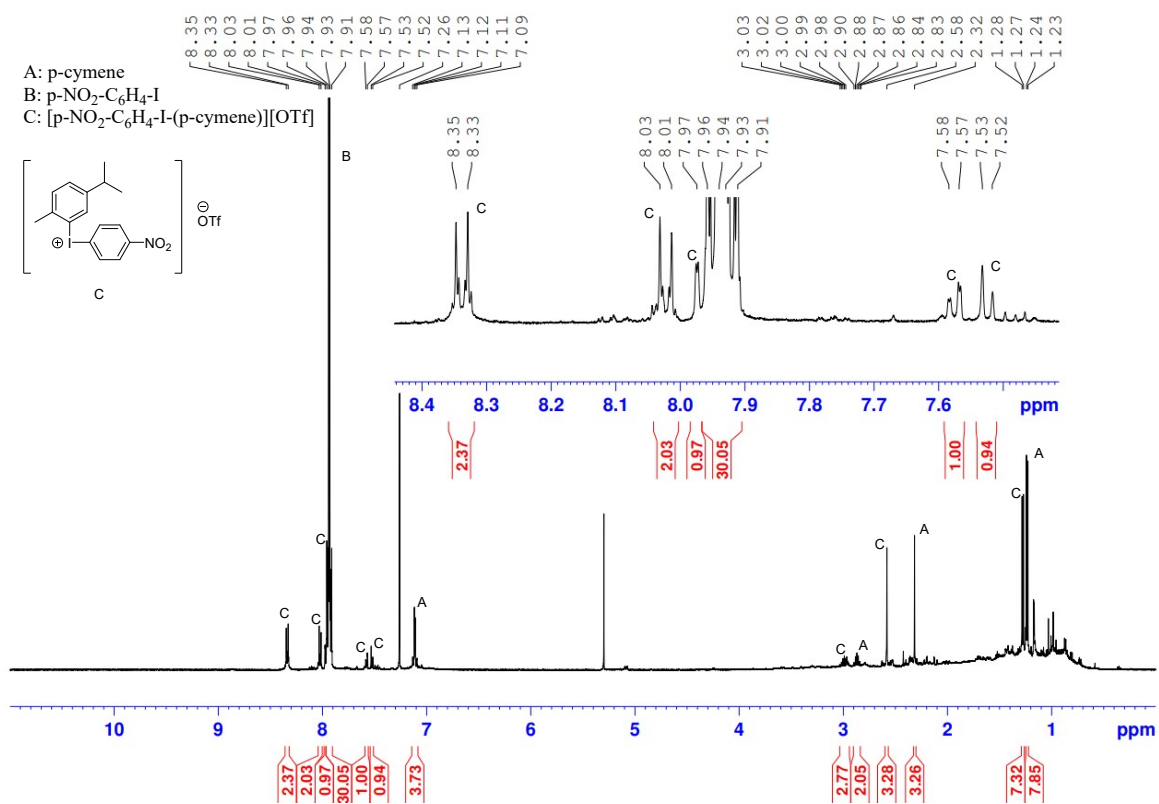

Figure S 35:  $^1\text{H}$  NMR of  $\text{NO}_2\text{-C}_6\text{H}_4\text{-I}(\text{OTf})_2$  with  $\alpha$ -pinene in  $\text{CDCl}_3$

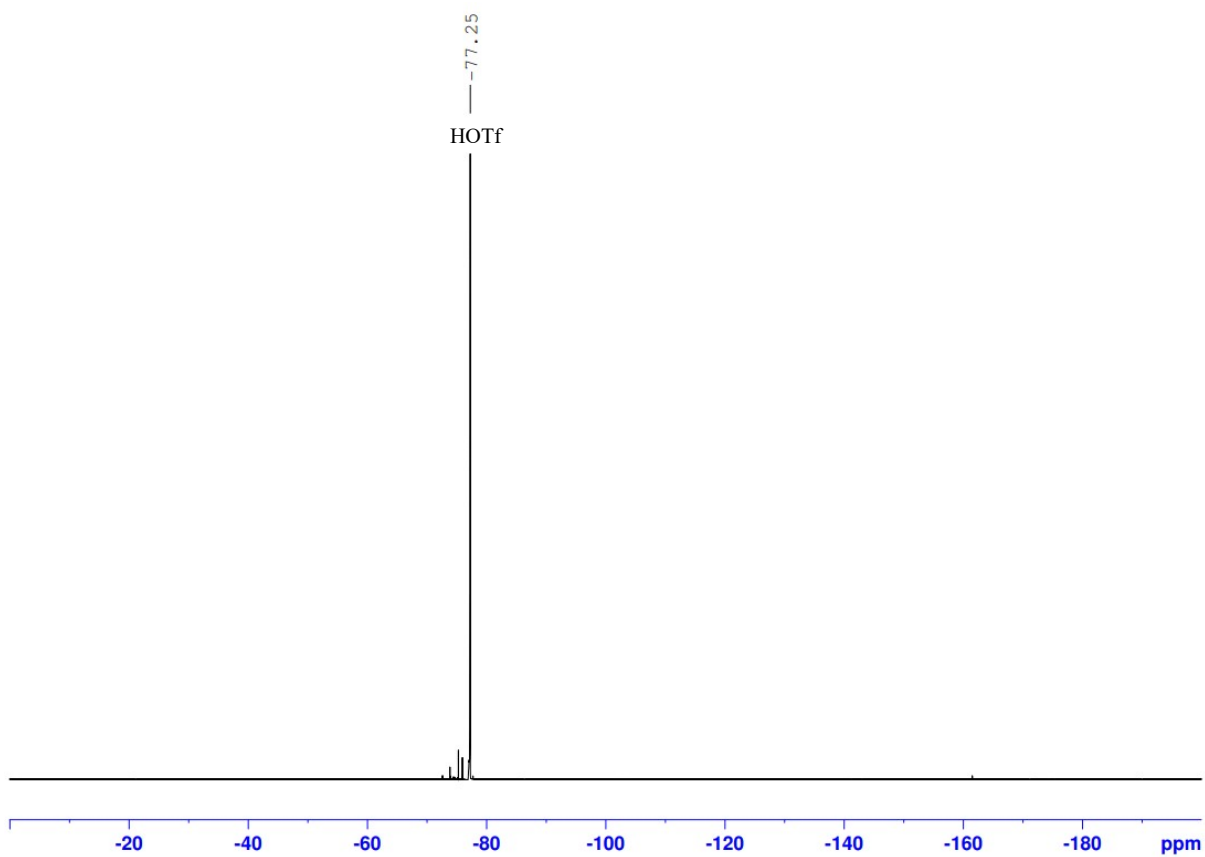

Figure S 36:  $^{19}\text{F}$  NMR of  $\text{NO}_2\text{-C}_6\text{H}_4\text{-I}(\text{OTf})_2$  with  $\alpha$ -pinene in  $\text{CDCl}_3$

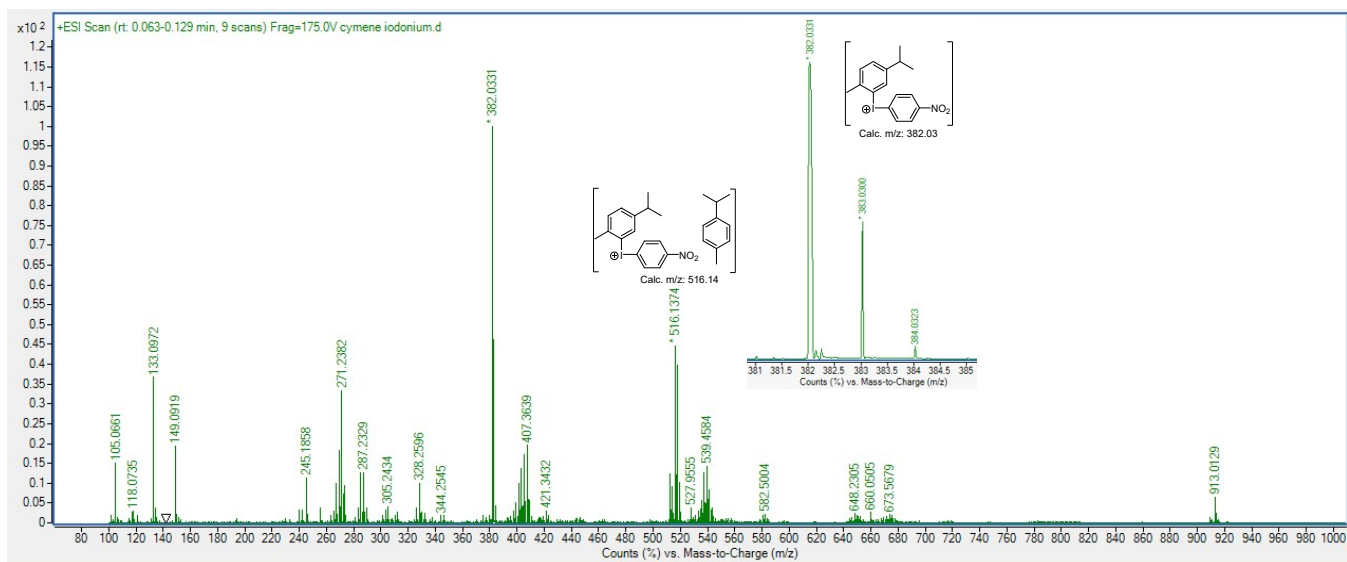

Figure S 37: HRMS of  $\text{NO}_2\text{-C}_6\text{H}_4\text{-I}(\text{OTf})_2$  with  $\alpha$ -pinene

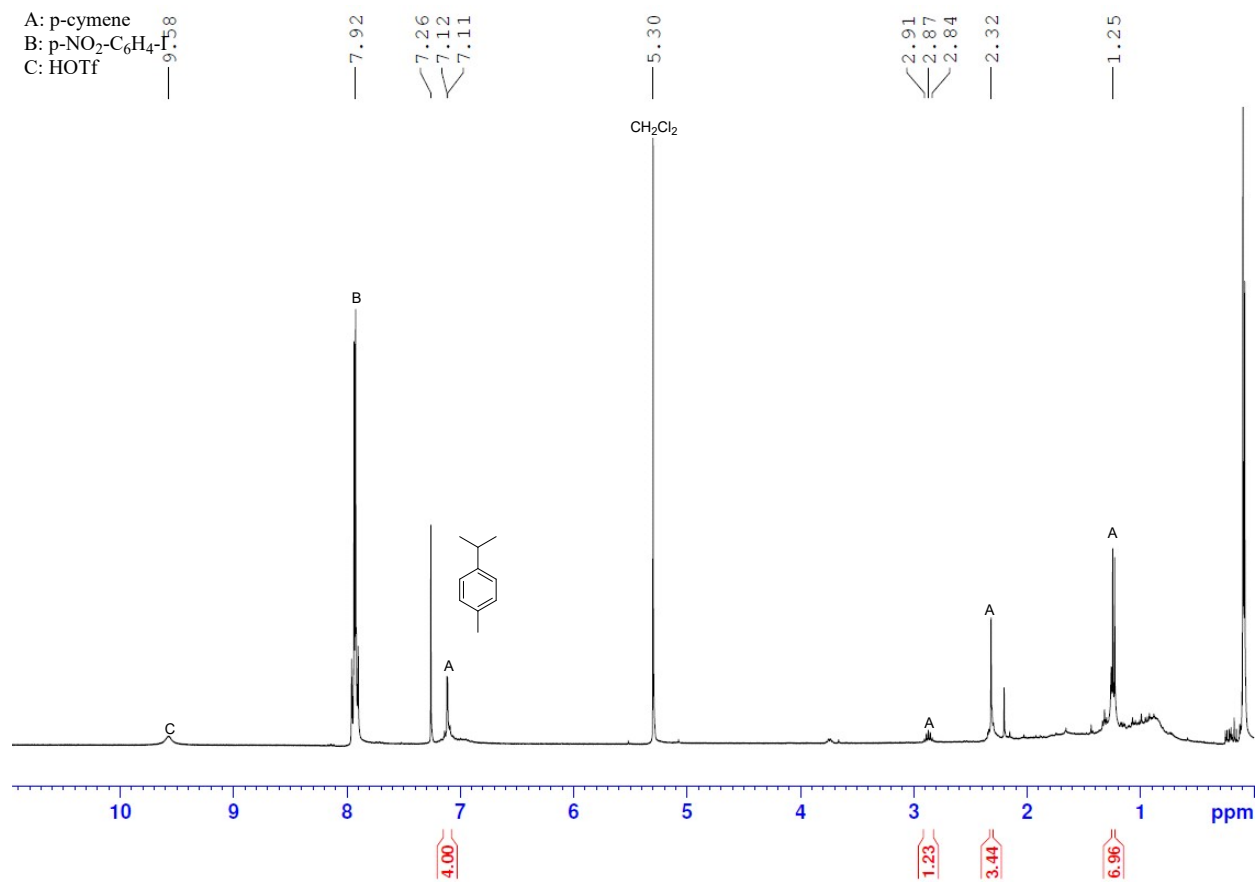

Figure S 38: <sup>1</sup>H NMR of NO<sub>2</sub>-C<sub>6</sub>H<sub>4</sub>-I(OTf)<sub>2</sub> with α-pinene at -94 °C in CDCl<sub>3</sub>

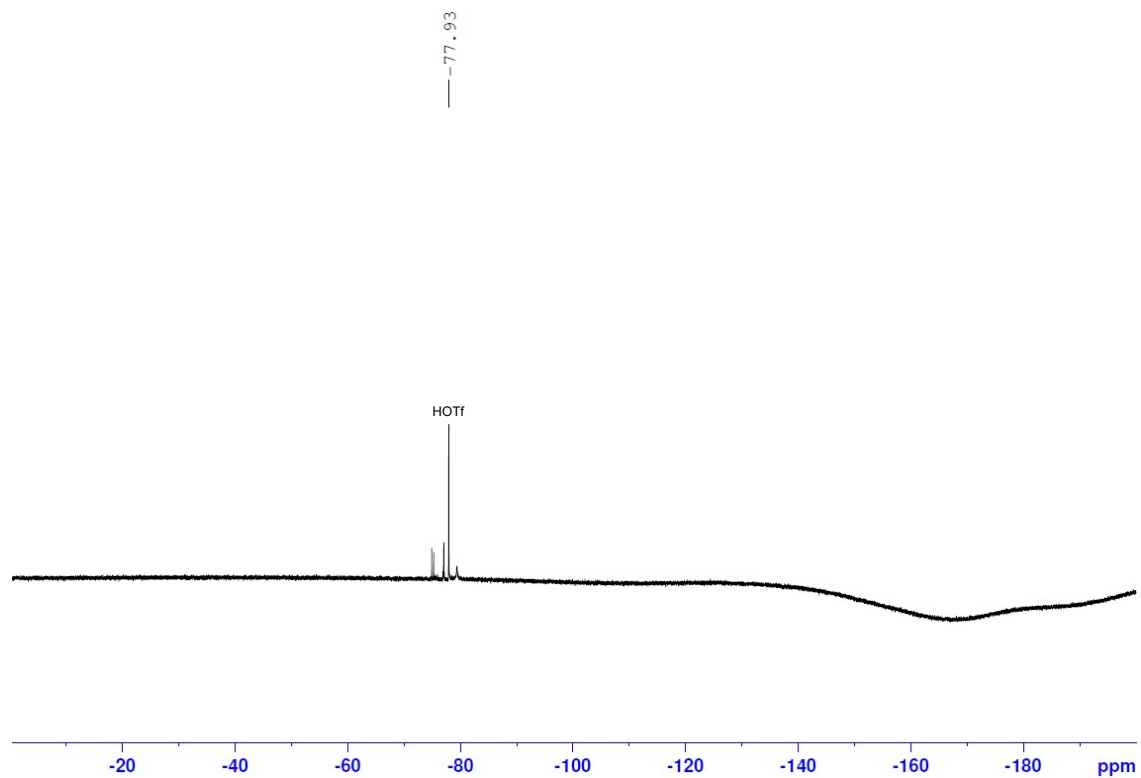

Figure S 39:  $^{19}\text{F}$  NMR of  $\text{NO}_2\text{-C}_6\text{H}_4\text{-I}(\text{OTf})_2$  with  $\alpha$ -pinene at  $-94^\circ\text{C}$  in  $\text{CDCl}_3$

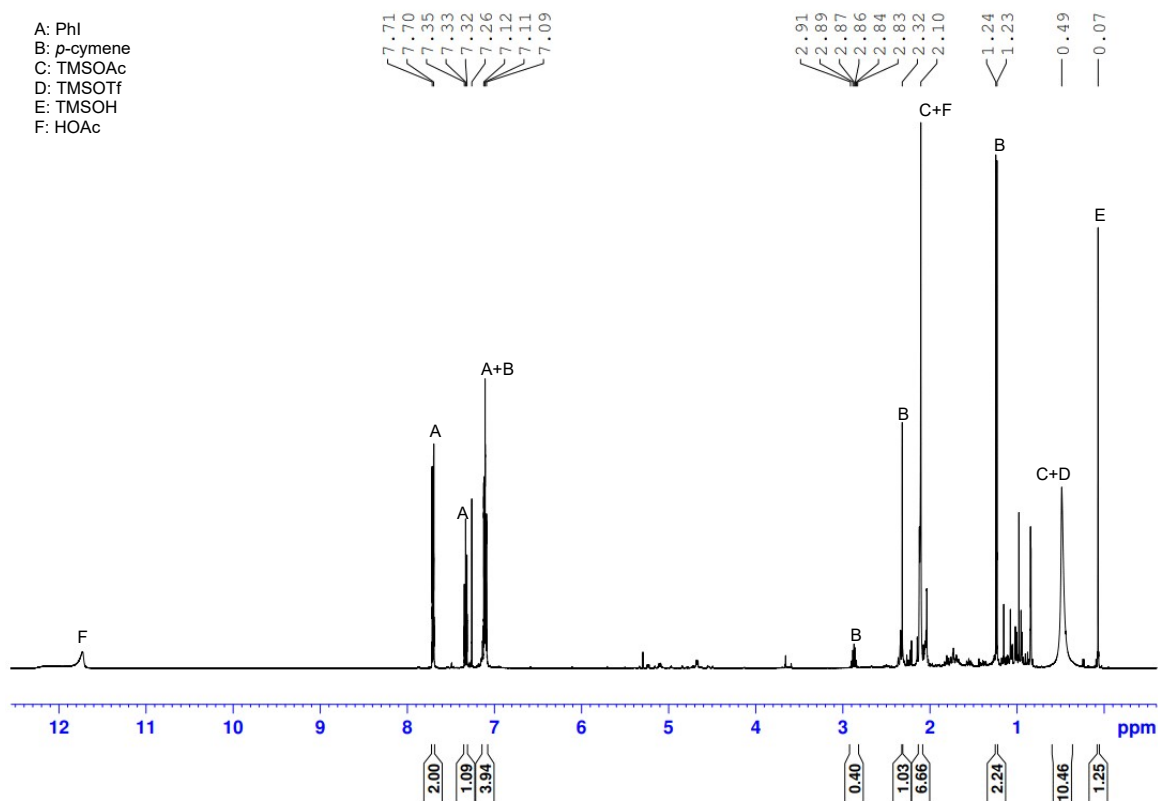

Figure S 40:  $^1\text{H}$  NMR of  $\text{PhI}(\text{OAc})(\text{OTf})$  with  $\alpha$ -pinene in  $\text{CDCl}_3$  (reaction time  $\sim 17$  h)



A: 3-CF<sub>3</sub>-C<sub>6</sub>H<sub>4</sub>-IF<sub>2</sub>

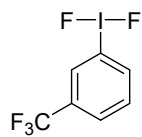

8.20  
8.13  
8.11  
7.80  
7.78  
7.77  
7.75  
7.26

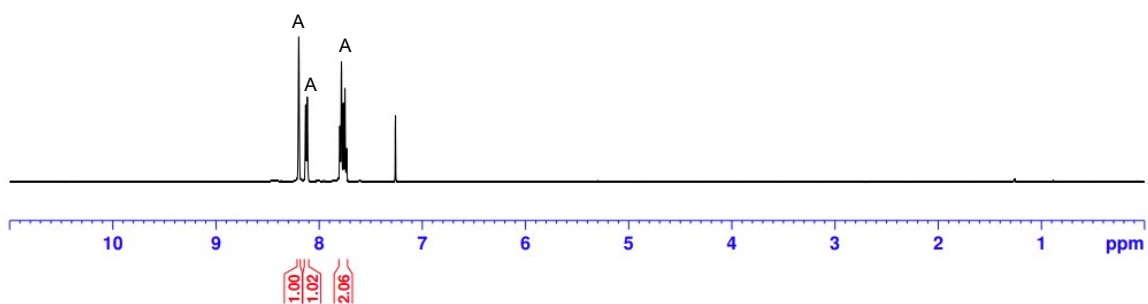

Figure S 41: <sup>1</sup>H NMR of 3-CF<sub>3</sub>-C<sub>6</sub>H<sub>4</sub>-IF<sub>2</sub> synthesised via XeF<sub>2</sub> in CDCl<sub>3</sub>

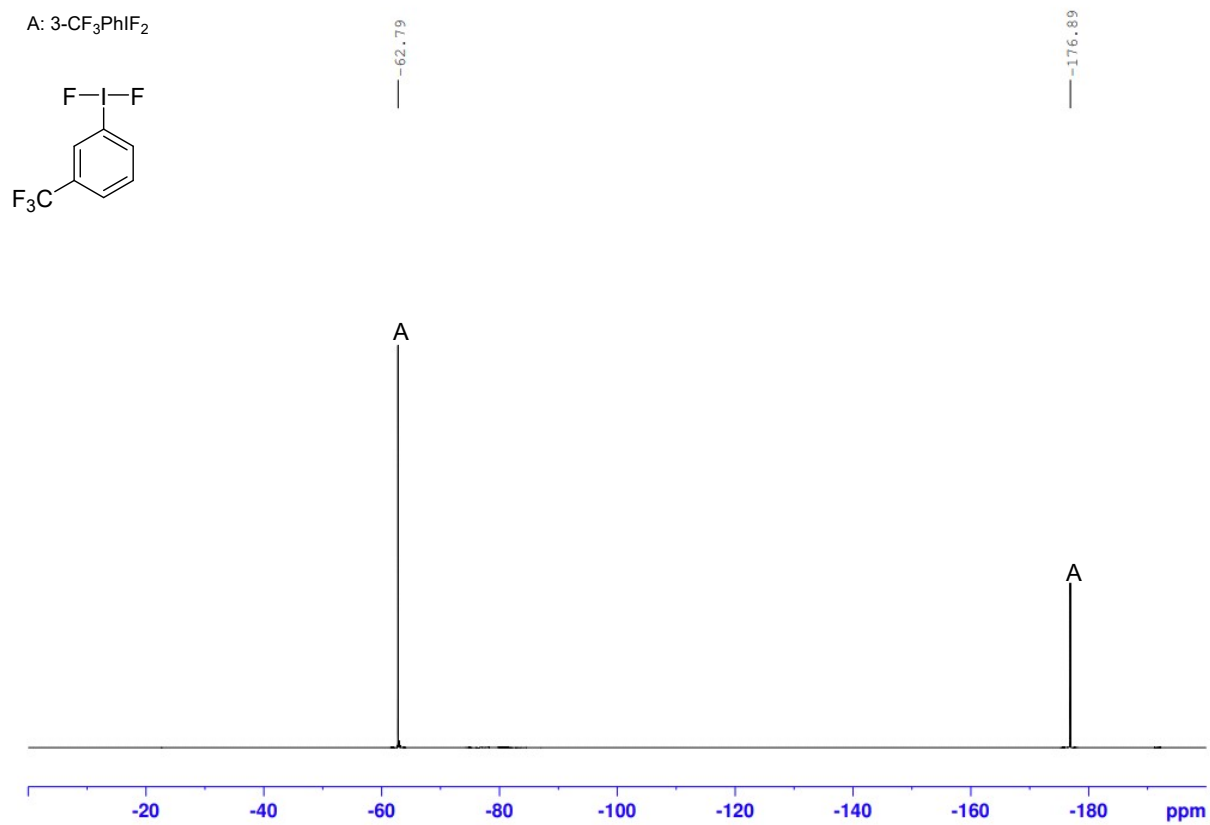

Figure S 42: <sup>19</sup>F NMR of 3-CF<sub>3</sub>-C<sub>6</sub>H<sub>4</sub>-IF<sub>2</sub> via XeF<sub>2</sub> in CDCl<sub>3</sub>

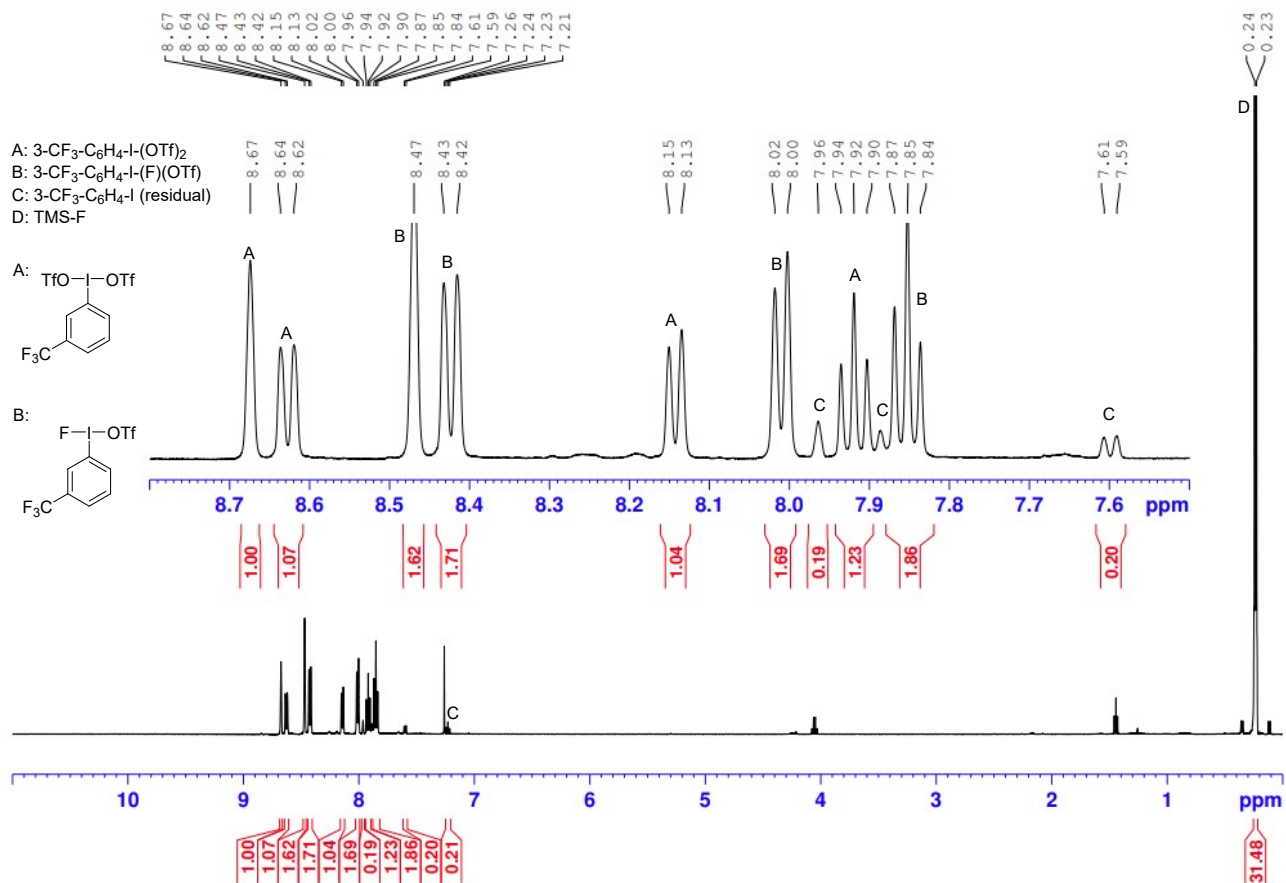

Figure S 43: <sup>1</sup>H NMR of crude reaction of 3-CF<sub>3</sub>-C<sub>6</sub>H<sub>4</sub>-I with XeF<sub>2</sub> with TMSOTf spike and then added 1 equivalent of TMSOTf in CDCl<sub>3</sub>. Spectrum shows the formation of 3-CF<sub>3</sub>-C<sub>6</sub>H<sub>4</sub>-I(OTf)<sub>2</sub> even with 1 equivalent of TMSOTf

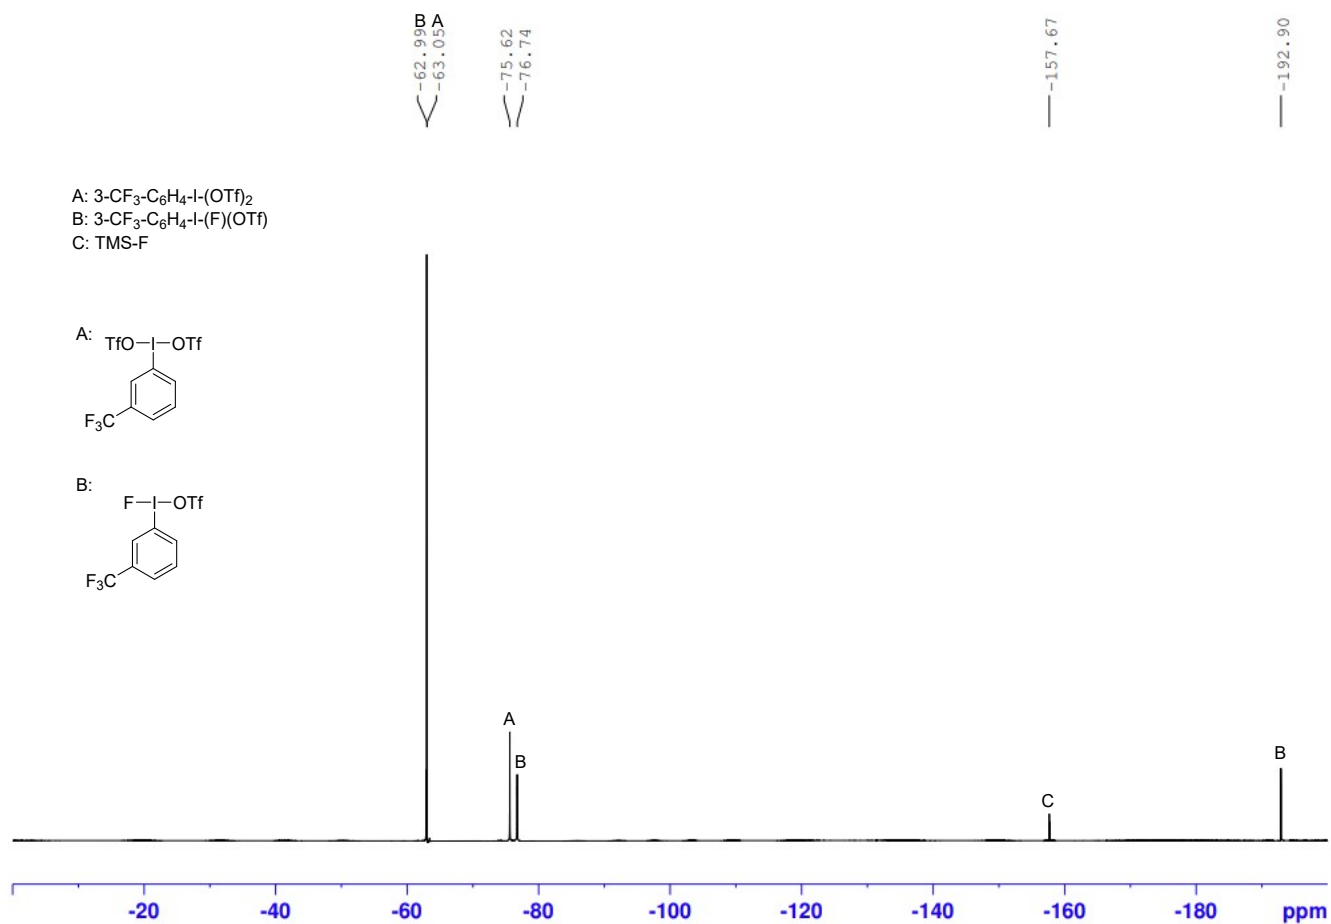

Figure S 44:  $^{19}\text{F}$  NMR of crude reaction of  $3\text{-CF}_3\text{-C}_6\text{H}_4\text{-I}$  with  $\text{XeF}_2$  with TMSOTf spike and then added 1 equivalent of TMSOTf in  $\text{CDCl}_3$ . Spectrum shows the formation of  $3\text{-CF}_3\text{-C}_6\text{H}_4\text{-I(OTf)}_2$  with 1 equivalent of TMSOTf

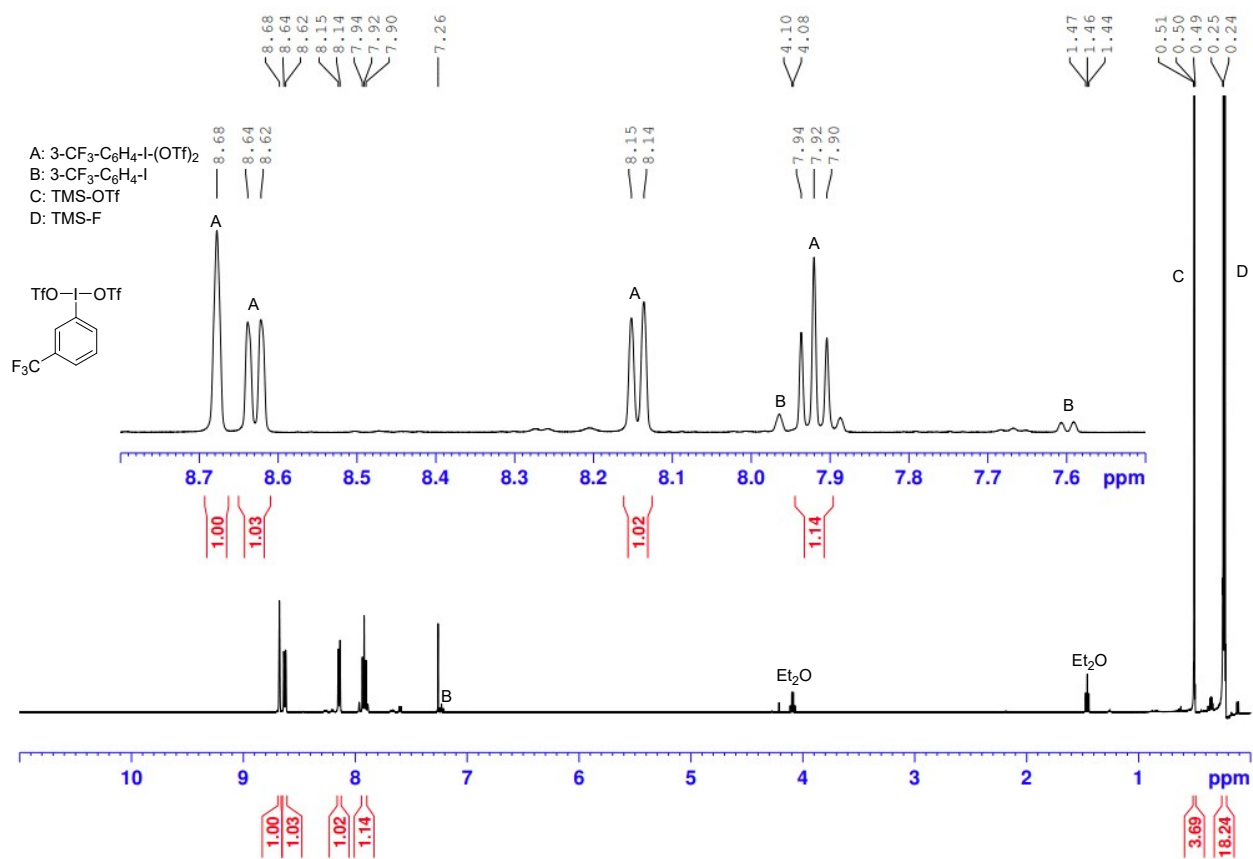

Figure S 45: <sup>1</sup>H NMR of crude reaction of 3-CF<sub>3</sub>-C<sub>6</sub>H<sub>4</sub>-I with XeF<sub>2</sub> and two equivalents TMS-OTf in CDCl<sub>3</sub>

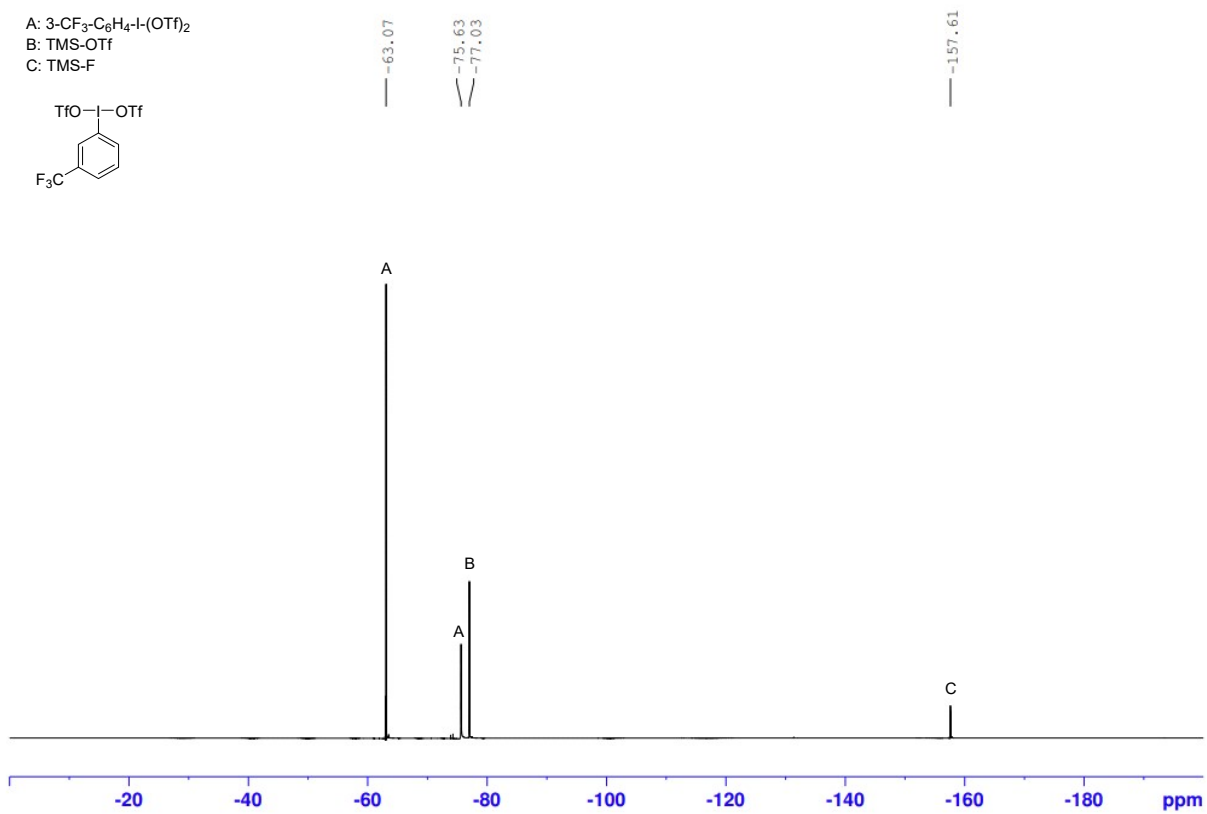

Figure S 46: <sup>19</sup>F NMR of crude reaction of 3-CF<sub>3</sub>-C<sub>6</sub>H<sub>4</sub>-I with XeF<sub>2</sub> and two eq. of TMS-OTf in CDCl<sub>3</sub>

A: 3-CF<sub>3</sub>-C<sub>6</sub>H<sub>4</sub>-I(OTf)<sub>2</sub>

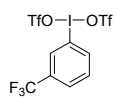

8.67  
8.64  
8.62  
8.16  
8.14  
7.99  
7.93  
7.91  
7.26

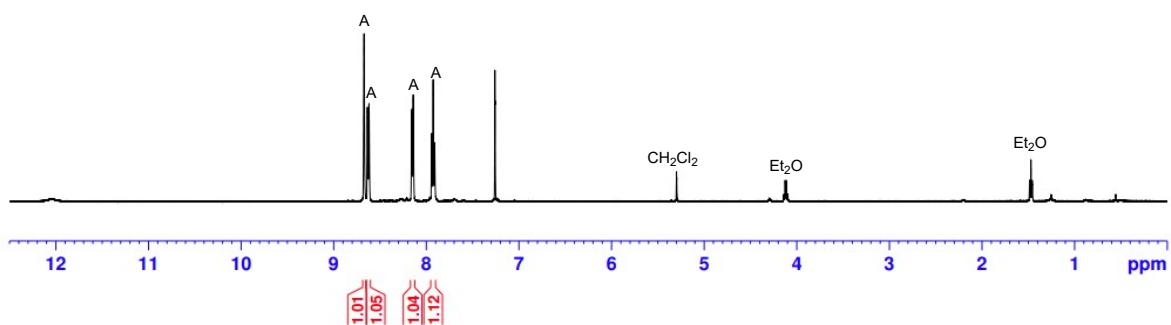

Figure S 47: <sup>1</sup>H NMR of 3-CF<sub>3</sub>-C<sub>6</sub>H<sub>4</sub>-I(OTf)<sub>2</sub> in CDCl<sub>3</sub>

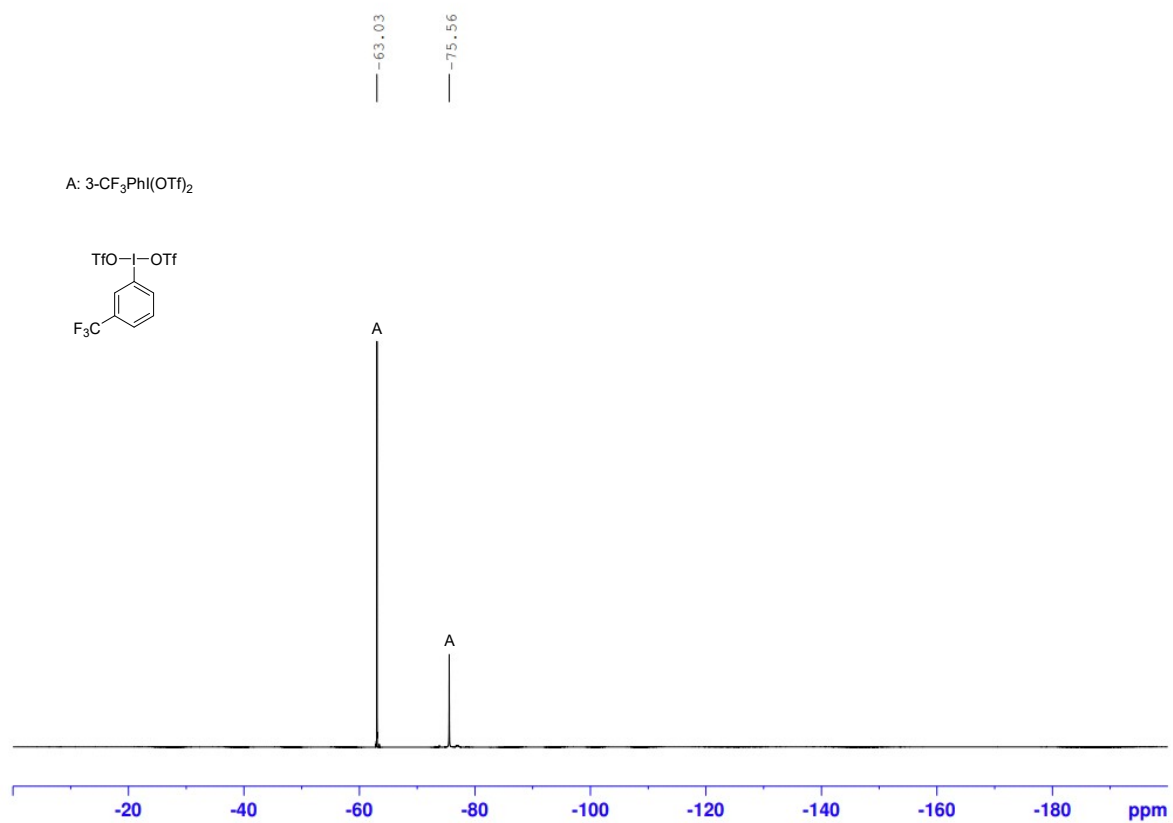

Figure S 48: <sup>19</sup>F NMR of 3-CF<sub>3</sub>-C<sub>6</sub>H<sub>4</sub>-I(OTf)<sub>2</sub> in CDCl<sub>3</sub>



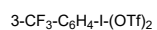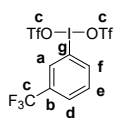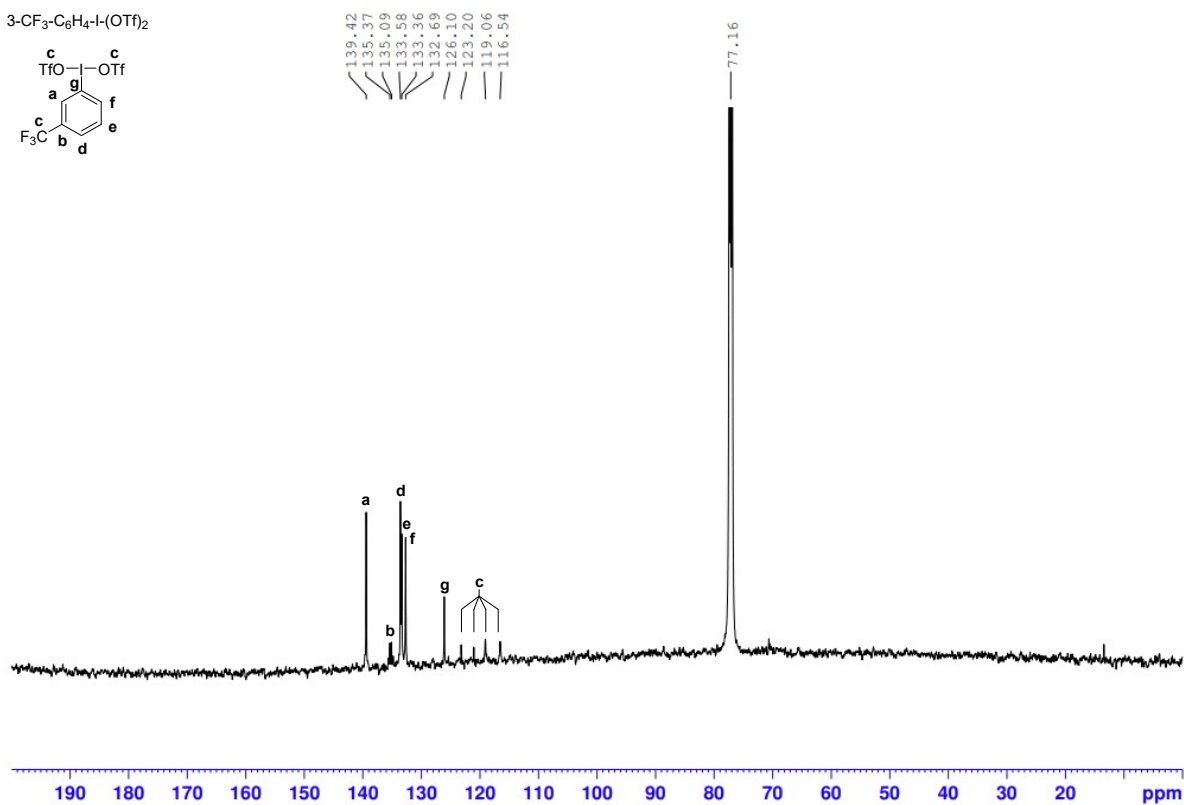

Figure S 49: <sup>13</sup>C NMR of 3-CF<sub>3</sub>-C<sub>6</sub>H<sub>4</sub>-I-(OTf)<sub>2</sub> in CDCl<sub>3</sub>

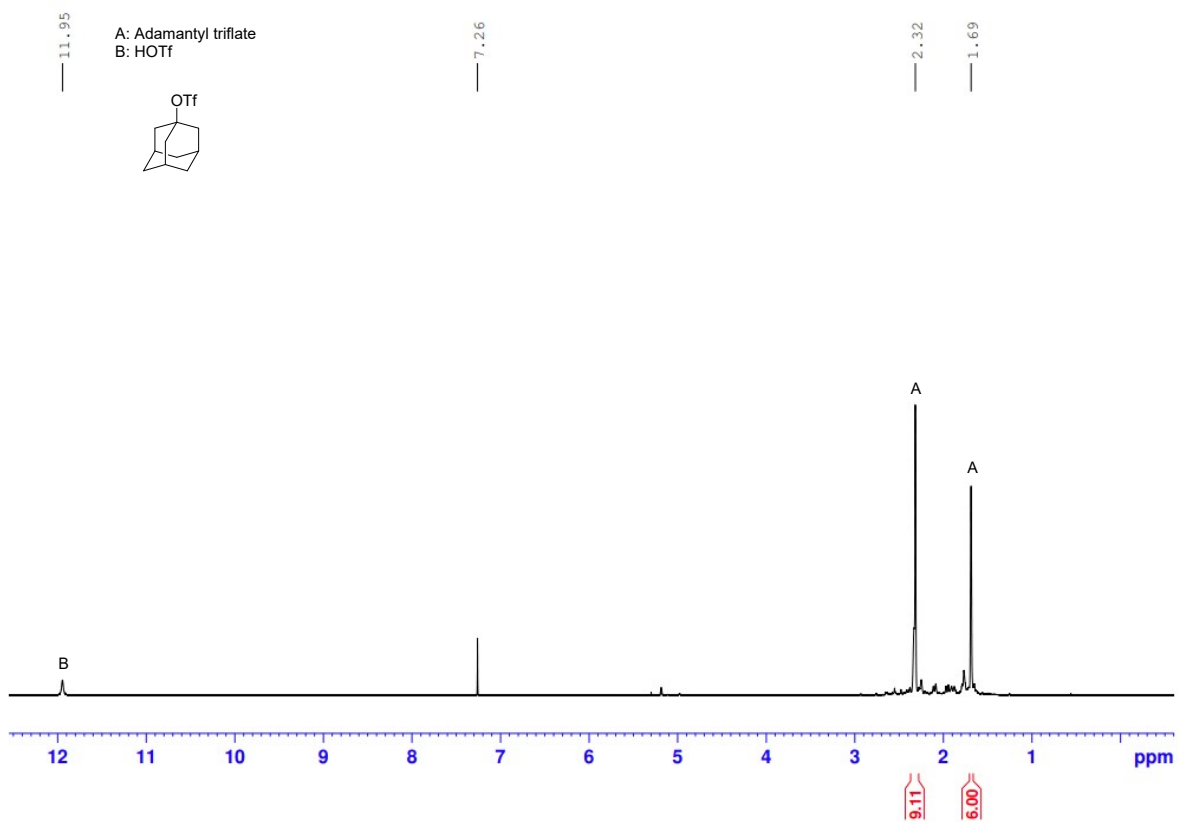

Figure S 50:  $^1\text{H}$  NMR of adamantyl triflate generated via reaction of  $3\text{-CF}_3\text{-C}_6\text{H}_4\text{-I(OTf)}_2$  with adamantane in  $\text{CDCl}_3$

A: Adamantyl triflate  
B: HOTf

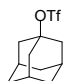

-75.86  
-76.85

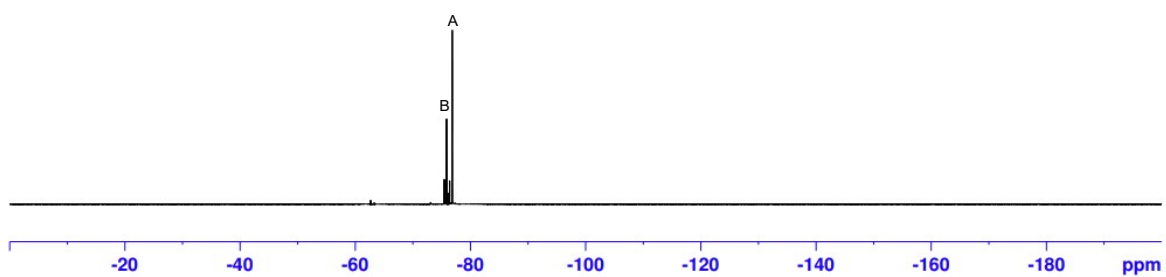

Figure S 51:  $^{19}\text{F}$  NMR of adamantyl triflate generated via reaction of  $3\text{-CF}_3\text{-C}_6\text{H}_4\text{-I}(\text{OTf})_2$  with adamantane in  $\text{CDCl}_3$

A: Adamantyl triflate

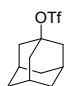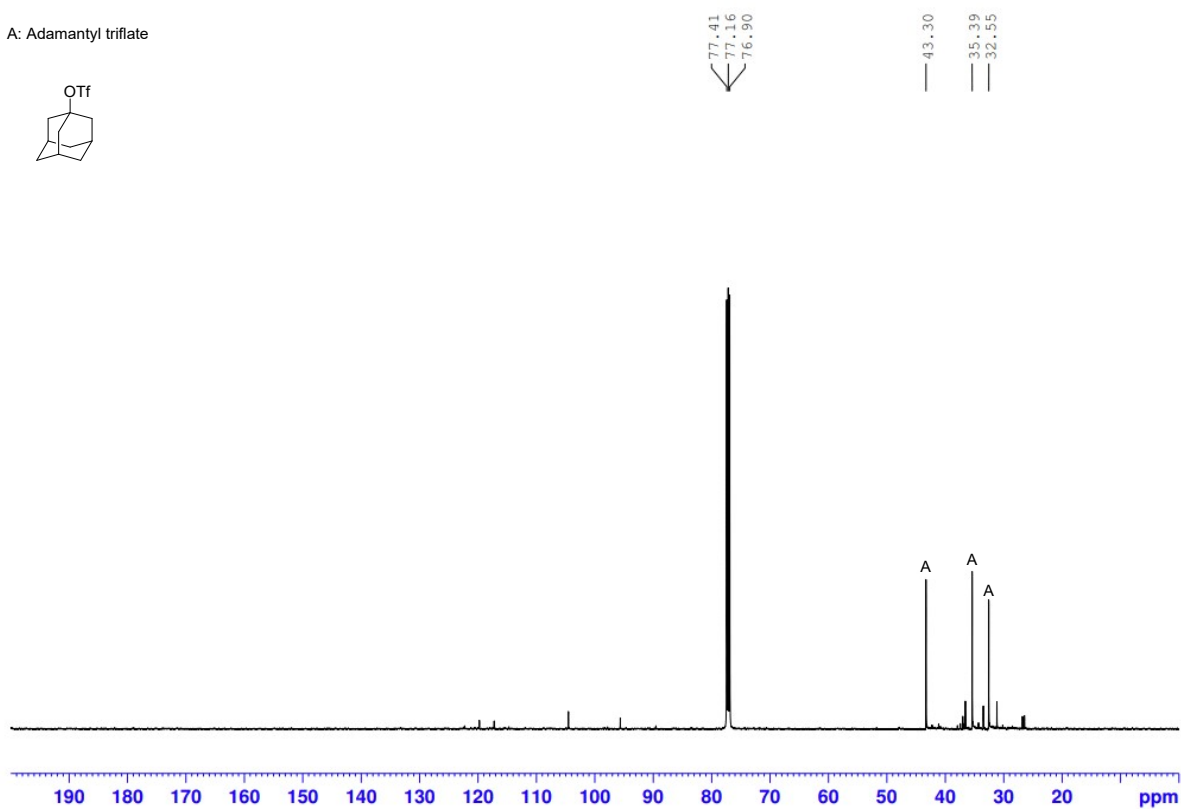

Figure S 52: <sup>13</sup>C NMR of adamantyl triflate generated via reaction of 3-CF<sub>3</sub>-C<sub>6</sub>H<sub>4</sub>-I(OTf)<sub>2</sub> with adamantane in CDCl<sub>3</sub> Structural Data

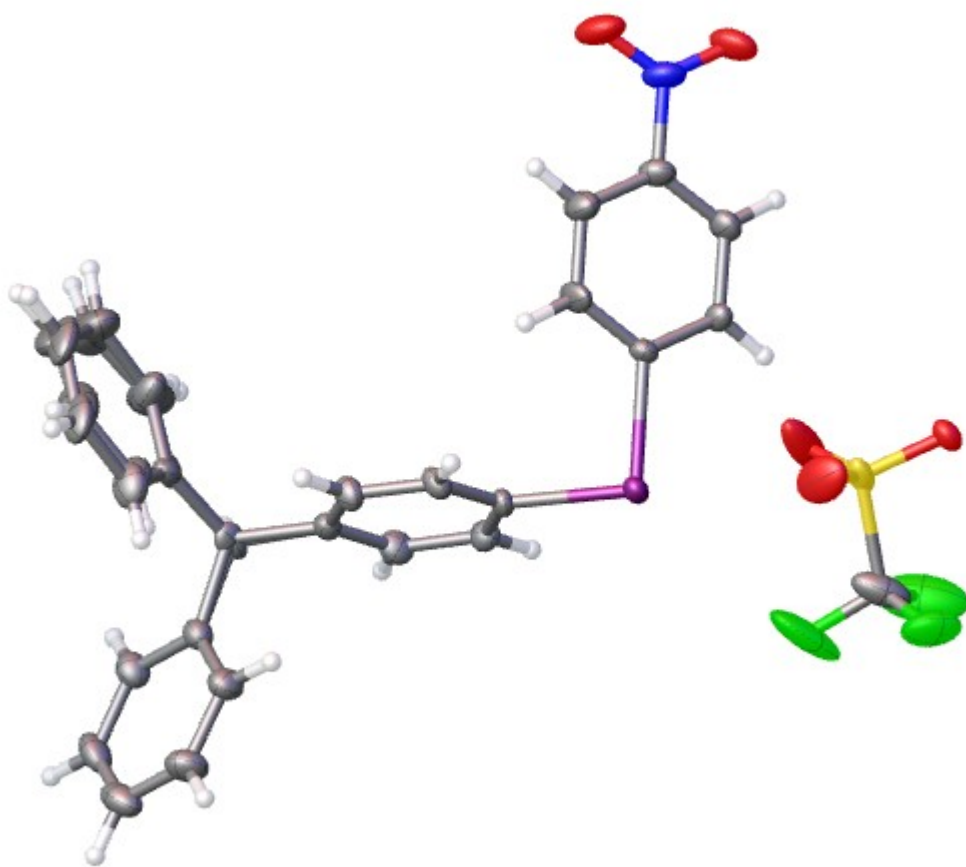

Figure S 53: Crystal structure of  $[\text{Ph}_2\text{CHPhI-C}_6\text{H}_4\text{-NO}_2][\text{OTf}]$

## Reference chemical shifts for NMR Spectra

**Et<sub>3</sub>SiOTf** (from the reaction of Et<sub>3</sub>SiH with 1 eq HOTf in CDCl<sub>3</sub>)

<sup>1</sup>H NMR (CDCl<sub>3</sub>) δ (ppm): 1.06 (t, 9H), 0.93 (q, 6H)

<sup>19</sup>F NMR (CDCl<sub>3</sub>) δ (ppm): -79.57 (s, 3F)

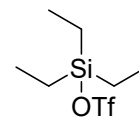

**Et<sub>3</sub>SiTFA** (from the reaction of PhI(TFA)<sub>2</sub> with 1 eq Et<sub>3</sub>SiH in CDCl<sub>3</sub>)

<sup>1</sup>H NMR (CDCl<sub>3</sub>) δ (ppm): 1.01 (t, 9H), 0.87 (q, 6H)

<sup>19</sup>F NMR (CDCl<sub>3</sub>) δ (ppm): -76.04 (s, 3F)

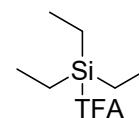

**Et<sub>3</sub>SiOAc<sup>3</sup>**

<sup>1</sup>H NMR (CDCl<sub>3</sub>) δ (ppm): 2.05 (s, 3H), 0.93 (t, 9H), 0.72 (q, 6H)

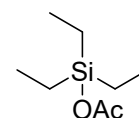

**Cycloheptatriene** (commercially available sample)

<sup>1</sup>H NMR (CDCl<sub>3</sub>) δ (ppm): 6.58 (t, 2H), 6.18 (t of d, 2H), 5.35 (t of d, 2H), 2.42 (t, 2H)

<sup>13</sup>C NMR (CDCl<sub>3</sub>) δ (ppm): 130.92, 126.55, 120.88, 27.97

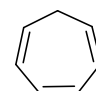

**Tropylium** (from the reaction of cycloheptatriene with 1 eq TMSOTf in CDCl<sub>3</sub>)

<sup>1</sup>H NMR (CDCl<sub>3</sub>) δ (ppm): 9.33 (s, 7H)

<sup>13</sup>C NMR (CDCl<sub>3</sub>) δ (ppm): 155.58

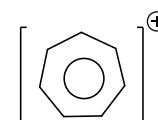

**Adamantane** (commercially available sample)

<sup>1</sup>H NMR (CDCl<sub>3</sub>) δ (ppm): 1.87 (br. s, 4H), 1.75 (t, 12H)

<sup>13</sup>C NMR (CDCl<sub>3</sub>) δ (ppm): 37.85, 28.46

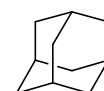

### Adamantyl triflate<sup>4</sup>

<sup>1</sup>H NMR (CDCl<sub>3</sub>) δ (ppm): 2.27 (s, 9H), 1.68 (s, 6H)

<sup>13</sup>C NMR (CDCl<sub>3</sub>) δ (ppm): 118.3, 103.7, 43.3, 35.4, 32.5

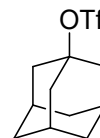

### p-cymene<sup>5</sup>

<sup>1</sup>H NMR (CDCl<sub>3</sub>) δ (ppm): 7.14-7.10 (m, 4H), 2.89-2.85 (m, 1H), 2.31 (s, 3H),

1.24 (d, 6H)

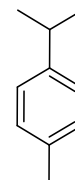

### Computational Details

All geometry optimisation, vibrational frequency and molecular orbital calculations were performed using  $\omega$ PBE/def2-TZVP within Gaussian 16 using the WebMO platform.<sup>6-8</sup> The structures obtained are minima with no negative frequencies. Cartesian coordinates are in Å and energies are given in Hartree. The free energy is calculated at 1 atm and 298 K.

### Cartesian Coordinates for optimised compound geometries

#### NO<sub>2</sub>-C<sub>6</sub>H<sub>4</sub>-I(OTf)<sub>2</sub>

Electronic Energy: -2656.30893914 Hartree

S 0.00000000 0.00000000 0.00000000

C -1.13600600 -0.74388100 1.23589400

F -2.09799600 -1.38300800 0.58996200

F -0.47194600 -1.60180200 1.99828500

F -1.66627000 0.19927300 1.99807800

O 1.00063100 0.65490100 0.96539800

I 3.05931700 0.47597300 0.65324800

C 3.05961100 2.55911400 0.65336800

C 2.09529800 3.21431900 -0.08375500

C 2.09827800 4.59484000 -0.07920100  
C 3.05996900 5.25290300 0.65350500  
C 4.02149000 4.59451000 1.38613300  
C 4.02410400 3.21398500 1.39054600  
H 4.77947600 2.67998700 1.95218300  
H 4.75396100 5.15787900 1.94734600  
N 3.06015200 6.73014100 0.65359600  
O 2.21654200 7.28121400 -0.00681700  
O 3.90387300 7.28092400 1.31410600  
H 1.36596200 5.15846500 -0.64035900  
H 1.33980300 2.68055700 -0.64545000  
O 5.11804000 0.65419700 0.34104900  
S 6.11860500 0.00001000 1.30699800  
C 7.25448900 -0.74509300 0.07173000  
F 8.21639200 -1.38380700 0.71820200  
F 6.59029500 -1.60356900 -0.68991700  
F 7.78489100 0.19733000 -0.69127400  
O 6.85792300 0.98859000 2.00564000  
O 5.49128600 -1.07196200 2.00344100  
O 0.62722900 -1.07265900 -0.69547600  
O -0.73919500 0.98804200 -0.69952400

**HSiEt<sub>3</sub>**

Electronic Energy: -527.64961327 Hartree



Si 0.00000000 0.00000000 0.00000000  
C 1.35088000 -1.08996300 -0.72015700  
C 2.65615500 -1.12078100 0.06906700  
H 3.10892400 -0.13140700 0.14678600  
H 2.49056400 -1.47764400 1.08703200  
H 3.39126500 -1.78057500 -0.39592200  
H 0.94660000 -2.10421000 -0.79479900  
H 1.53881500 -0.77247000 -1.75094600  
C -1.67998700 -0.64588200 -0.52670300  
C -2.86503100 0.14898500 0.01036000  
H -3.81695100 -0.29576400 -0.28558000  
H -2.85069000 0.19550000 1.10132900  
H -2.85836300 1.17622500 -0.35828100  
H -1.71086900 -0.67496300 -1.62076300  
H -1.75061000 -1.68801100 -0.20039100  
C 0.17931000 1.79648300 -0.51084900  
H -0.61600600 2.35919800 -0.01287500  
C 1.52959700 2.43615800 -0.20769700  
H 1.53868900 3.49670400 -0.46619300  
H 1.78194900 2.35565600 0.85169200  
H 2.33297600 1.95917600 -0.77145200  
H -0.03489400 1.86612100 -1.58254000

H 0.08971700 -0.07165700 1.49007300

### **NO<sub>2</sub>-C<sub>6</sub>H<sub>4</sub>-I**

Electronic Energy: -733.753165289 Hartree

C 0.00000000 0.00000000 0.00000000

C 0.68406100 -1.20389400 -0.00085400

C 2.06383000 -1.20639200 -0.00067100

C 2.72849500 -0.00010300 0.00015100

C 2.06389500 1.20618800 0.00084400

C 0.68406500 1.20377300 0.00080400

H 0.14266000 2.14081100 0.00149400

H 2.62692700 2.12923400 0.00141700

N 4.20031100 -0.00005600 0.00025800

O 4.75794300 -1.07017500 0.00199600

O 4.75762100 1.07018200 -0.00207300

H 2.62686700 -2.12942900 -0.00108800

H 0.14249700 -2.14084400 -0.00156800

I -2.06699400 -0.00005300 0.00006400

### **HOTf**

Electronic Energy: -961.91585154 Hartree

S 0.00000000 0.00000000 0.00000000

C 1.82881000 -0.14063700 -0.07717700  
F 2.36030300 0.75447100 0.73820600  
F 2.19421500 -1.35984800 0.30789800  
F 2.25609700 0.07174000 -1.30998400  
O -0.39210700 -1.16908700 -0.97099000  
H -0.53854500 -1.98218600 -0.46570200  
O -0.34822000 1.21454700 -0.62446400  
O -0.38056200 -0.34594600 1.32045600

**NO<sub>2</sub>-C<sub>6</sub>H<sub>4</sub>-I(OTf)(H)**

Electronic Energy: -1695.59888025 Hartree

S 0.00000000 0.00000000 0.00000000  
O -1.47820500 0.05147100 0.11489000  
I -2.19967600 2.31540900 0.71975500  
H -3.00994500 3.69231500 1.10023500  
C -4.03302100 1.32440200 0.74037900  
C -4.90341000 1.57094300 1.78346800  
C -6.12485400 0.92873900 1.79172400  
C -6.42037000 0.06414500 0.76187100  
C -5.54795400 -0.19026500 -0.27188700  
C -4.32586100 0.45316500 -0.28726200  
H -3.60961200 0.25459200 -1.07218200  
H -5.82544100 -0.88499100 -1.05252400

N -7.72848800 -0.62067900 0.77079200  
O -8.46786400 -0.38477500 1.69328000  
O -7.96809500 -1.36548100 -0.14494800  
H -6.84120500 1.08607100 2.58601200  
H -4.64319000 2.24445800 2.59002900  
O 0.47317600 -0.85675500 -1.03018100  
C 0.45779400 -0.82388600 1.57199000  
F 1.77702300 -0.90814500 1.68757400  
F -0.01211500 -0.11887200 2.61000100  
F -0.05743000 -2.04714000 1.63580000  
O 0.55966100 1.32275900 0.11646300

**Et<sub>3</sub>SiOTf**

Electronic Energy: -1488.42469982 Hartree

Si 0.00000000 0.00000000 0.00000000  
C 1.07940000 -1.26185300 -0.83604700  
C 0.61729400 -2.71449000 -0.76033000  
H 0.49184100 -3.05195100 0.26849900  
H -0.33778400 -2.85444200 -1.26840400  
H 1.33823700 -3.37794000 -1.23970600  
H 1.18421800 -0.95975400 -1.88236700  
H 2.07875100 -1.15894800 -0.39850200  
C 0.24237500 1.69202900 -0.72629800

C -0.62705500 2.78722800 -0.11722000  
H -0.42974300 3.75421600 -0.58166000  
H -1.68820400 2.57163800 -0.25007600  
H -0.44672000 2.89652900 0.95359800  
H 1.30283100 1.94229400 -0.61240500  
H 0.06715300 1.62324600 -1.80373000  
C 0.12917100 0.04186400 1.85707700  
C 0.54938000 -1.23477900 2.57768500  
H 0.67633300 -1.05182500 3.64566100  
H -0.19815200 -2.01814000 2.46419100  
H 1.49935000 -1.61621900 2.19886500  
H -0.81984600 0.40829700 2.25828000  
H 0.85634600 0.83592000 2.06506500  
O -1.62816700 -0.35188800 -0.48266600  
S -2.72798400 -1.31400000 -0.03711400  
C -4.01815500 -0.08315800 0.39171100  
F -4.32927200 0.65397200 -0.66550600  
F -5.09855400 -0.72218400 0.81304300  
F -3.58197100 0.71843800 1.36004300  
O -3.22131800 -2.03955500 -1.14792500  
O -2.37779100 -1.96751800 1.17479400

### **Cyclohexene**

Electronic Energy: -234.576600754 Hartree

C 0.00000000 0.00000000 0.00000000  
C -0.79633600 1.22033000 -0.43406100  
C 0.02878000 2.46998600 -0.38146600  
C 1.34648700 2.46996300 -0.26455900  
C 2.17152600 1.22025500 -0.21184100  
C 1.37515700 0.00000800 -0.64606000  
H 1.91900200 -0.91407600 -0.39886500  
H 1.25811500 0.01511900 -1.73421000  
H 2.55031900 1.08129700 0.80705500  
H 3.05596300 1.34078200 -0.84301400  
H 1.87473000 3.41722100 -0.20710000  
H -0.49942600 3.41726000 -0.43904000  
H -1.17534200 1.08143900 -1.45288600  
H -1.68064800 1.34091800 0.19728100  
H 0.11704600 0.01495000 1.08815200  
H -0.54388500 -0.91403000 -0.24731300

### **Benzene**

Electronic Energy: -232.150999992 Hartree

C 0.00000000 0.00000000 0.00000000  
C 1.31312500 -0.43457600 0.00000100  
C 1.59330000 -1.78891500 -0.00000200

C 0.56037600 -2.70881100 -0.00000300  
C -0.75259700 -2.27427500 0.00000200  
C -1.03281300 -0.91978600 -0.00000300  
H -2.06182400 -0.57933000 -0.00001100  
H -1.56206200 -2.99506900 0.00000500  
H 0.77997300 -3.77020400 0.00000300  
H 2.62225200 -2.12956100 -0.00000700  
H 2.12246800 0.28635000 0.00000300  
H -0.21940800 1.06143600 0.00000100

### **Phi(TFA)<sub>2</sub>**

Electronic Energy: -1581.47924091 Hartree

C 0.00000000 0.00000000 0.00000000  
C 1.45865500 0.31253900 -0.41008700  
O 2.25661300 0.24561200 0.61765000  
I 4.30438200 0.52843400 0.26194900  
C 3.93203000 2.55030300 0.12633500  
C 3.96172400 3.30423800 1.28335700  
C 3.71754500 4.66020100 1.18960000  
C 3.45250300 5.23283500 -0.04114200  
C 3.42699600 4.45831500 -1.18601700  
C 3.66786600 3.09959200 -1.11230300  
H 3.63246000 2.48050200 -1.99868400

H 3.21515900 4.91059200 -2.14692500  
H 3.26145600 6.29722800 -0.10816900  
H 3.73571000 5.27040900 2.08410200  
H 4.17184000 2.84741100 2.24205400  
O 6.30979700 1.14974400 0.00453100  
C 7.09956000 0.12273100 0.03090200  
O 6.76336400 -1.02446800 0.17814500  
C 8.58152000 0.52181400 -0.14931300  
F 9.36691000 -0.54359600 -0.12332000  
F 8.75448000 1.14799900 -1.31577300  
F 8.95842600 1.34999500 0.82873800  
O 1.74868900 0.58004500 -1.54263400  
F -0.42234100 0.88001100 0.91253700  
F -0.08386600 -1.22270400 0.52960700  
F -0.81085800 0.06058300 -1.04569900

### **Et<sub>3</sub>SiTFA**

Electronic Energy: -1053.23514592 Hartree

Si 0.00000000 0.00000000 0.00000000  
C 0.50615200 -1.24625900 -1.28870500  
C -0.27416200 -2.55657500 -1.33489700  
H -0.24211500 -3.08618100 -0.38320100  
H -1.32449400 -2.38355200 -1.57270300



H 0.12583400 -3.22267900 -2.10082000  
H 0.44721000 -0.74626800 -2.26035200  
H 1.57129600 -1.44726300 -1.12809800  
C 0.51408600 1.71450600 -0.50446400  
C 0.12114000 2.81291300 0.47833800  
H 0.44200900 3.79493300 0.12794300  
H -0.96065000 2.85119500 0.61555200  
H 0.57131100 2.65442400 1.46005300  
H 1.59966400 1.70532400 -0.64964700  
H 0.08308300 1.91736200 -1.48919000  
C 0.58747100 -0.38000100 1.72941300  
H -0.10926200 0.08325300 2.43443200  
C 0.81718500 -1.84103100 2.10015900  
H 1.22465000 -1.92748300 3.10866700  
H -0.11264000 -2.40669400 2.06722200  
H 1.52650400 -2.31946300 1.42218400  
H 1.52392200 0.17891300 1.84158700  
O -1.71832600 0.12950100 -0.04434500  
C -2.59581300 -0.64101800 0.54431300  
O -2.38664100 -1.60888200 1.21172900  
C -4.03058300 -0.13709600 0.26982100  
F -4.28089700 -0.14389300 -1.04320800  
F -4.92767900 -0.90272100 0.87123000

F -4.17771900 1.11504300 0.71387200

### **Trifluoroacetic acid**

Electronic Energy: -526.733471294 Hartree

C 0.00000000 0.00000000 0.00000000

C -1.53441600 -0.16077000 -0.00001100

O -2.08450100 -1.21496200 -0.00002600

O -2.11973400 1.02974500 0.00000300

H -3.07807800 0.89105200 0.00001200

F 0.39385200 0.67374200 -1.08187700

F 0.39389600 0.67380800 1.08176600

F 0.58694900 -1.18477400 0.00002500

### **Et<sub>3</sub>SiOAc**

Electronic Energy: -755.542608854 Hartree

Si 0.00000000 0.00000000 0.00000000

C -0.30030900 -1.33952100 -1.26476400

C -1.68519900 -1.97479900 -1.32708500

H -1.97292900 -2.41927400 -0.37526200

H -2.44865900 -1.23692700 -1.57536300

H -1.72336100 -2.75566600 -2.08889700

H -0.04643800 -0.91197900 -2.24016600

H 0.45785300 -2.10962600 -1.08120400  
C 1.48846600 0.99945000 -0.51491600  
C 1.85207500 2.13688700 0.43348900  
H 2.72456800 2.69040600 0.08220000  
H 1.02901900 2.84696400 0.52909500  
H 2.08261900 1.76734500 1.43457700  
H 2.33289700 0.30971500 -0.61900100  
H 1.29898500 1.39297200 -1.51796500  
C 0.23515300 -0.62231700 1.74722200  
H -0.08535200 0.16931700 2.43104800  
C -0.42919900 -1.94054400 2.12759500  
H -0.17387200 -2.22756100 3.14933800  
H -1.51323500 -1.86419200 2.06072600  
H -0.10823700 -2.75373600 1.47348500  
H 1.31947600 -0.70439300 1.88558800  
O -1.24527000 1.16550200 -0.09496700  
C -2.45460900 1.03778600 0.44677400  
O -2.80578400 0.05315100 1.04247600  
C -3.31278300 2.24658100 0.23159000  
H -3.41614000 2.43408900 -0.83698900  
H -4.28876000 2.09290900 0.68238000  
H -2.82883200 3.11906100 0.67018300

### Acetic Acid

Electronic Energy: -229.045788093 Hartree

C 0.00000000 0.00000000 0.00000000  
C -1.05760900 1.05576500 0.00000000  
O -2.29454700 0.52550700 0.00000000  
H -2.91358700 1.26902900 0.00000000  
O -0.87208300 2.24013500 0.00000000  
H 0.98034300 0.46614400 0.00000000  
H -0.11577500 -0.63330600 0.87915800  
H -0.11577500 -0.63330600 -0.87915800

### PhI(OAc)<sub>2</sub>

Electronic Energy: -986.095129962 Hartree

C 0.00000000 0.00000000 0.00000000  
C -1.23323700 0.79977300 -0.29440700  
O -2.33932000 0.09594900 -0.30900500  
I -3.96486900 1.37599900 -0.71896200  
C -5.01511400 -0.39621300 -0.58156500  
C -5.07713500 -1.21623500 -1.69147100  
C -5.77183100 -2.40669900 -1.60014700  
C -6.38886500 -2.75896900 -0.41355400  
C -6.31644800 -1.92478300 0.68621100  
C -5.62456200 -0.72997500 0.61111700

H -5.57946300 -0.05840000 1.45784300  
H -6.80318900 -2.20132900 1.61358700  
H -6.93341500 -3.69346900 -0.34645300  
H -5.83004600 -3.06094500 -2.46155700  
H -4.58924600 -0.93420200 -2.61595500  
O -5.76244200 2.30897300 -1.23561000  
C -6.59068600 2.61268500 -0.25235700  
C -7.78726200 3.38836000 -0.72210300  
H -7.45945000 4.30349700 -1.21414700  
H -8.42915600 3.62419000 0.12193400  
H -8.33490300 2.79920800 -1.45730400  
O -6.40720300 2.29552400 0.90037200  
O -1.22897200 1.99810000 -0.50269600  
H 0.87307500 0.64576500 -0.02494400  
H -0.09548300 -0.46377800 0.98141400  
H 0.10083700 -0.79957300 -0.73315000

### **Adamantane**

Electronic Energy: -390.625386723 Hartree

C 0.00000000 0.00000000 0.00000000  
C 0.70231800 1.35350400 -0.06148700  
C 1.13749800 1.63276600 -1.49734400  
C 2.09383100 0.53998300 -1.96681100

C 1.38847300 -0.81171000 -1.90138500  
C 0.95376000 -1.09631300 -0.46637300  
C 2.18185900 -1.11713300 0.43941200  
C 2.88905800 0.23388500 0.37879300  
C 1.93117300 1.32749500 0.84310700  
H 2.43344600 2.29949600 0.82052500  
H 1.62953200 1.14598600 1.87926300  
C 3.31961100 0.51539300 -1.05800700  
H 4.02122500 -0.25335400 -1.39616000  
H 3.84412000 1.47438100 -1.11070600  
H 3.76872900 0.21684100 1.02847900  
H 1.88407100 -1.33794900 1.46903700  
H 2.86533600 -1.91197300 0.12535400  
H 0.44854700 -2.06531400 -0.42153400  
H 0.51726000 -0.81188600 -2.56361000  
H 2.05926300 -1.60160800 -2.25305200  
H 2.40444400 0.74185700 -2.99587400  
H 0.26223800 1.67145500 -2.15307700  
H 1.62692500 2.60972400 -1.55707500  
H 0.01723500 2.13769300 0.27306600  
H -0.33261300 -0.20306400 1.02259300  
H -0.89348200 0.01267900 -0.63172800

## Adamantyl triflate

Electronic Energy: -1351.33549852 Hartree

C 0.00000000 0.00000000 0.00000000  
C -0.46589700 1.43914500 -0.12853100  
C -0.16321300 1.98618400 -1.51068200  
C 1.35040000 1.94705900 -1.72176600  
C 1.83867600 0.50609000 -1.60568100  
C 1.51330700 -0.03362900 -0.21609800  
C 2.19993600 0.82570700 0.84024100  
C 1.70790700 2.26464000 0.72213500  
C 0.19617200 2.29789500 0.93194700  
H -0.18393600 3.31942100 0.85649900  
H -0.06763900 1.91621000 1.92086900  
C 2.03774900 2.80587100 -0.66534200  
H 3.11988200 2.79708500 -0.82187300  
H 1.70796900 3.84509000 -0.75229500  
H 2.18483700 2.88377800 1.48548900  
H 1.98719200 0.43555800 1.83958600  
H 3.28414000 0.78904000 0.70384000  
H 1.85506600 -1.06765400 -0.13153300  
H 1.36358700 -0.11432500 -2.37057200  
H 2.91745700 0.46237700 -1.77848100  
H 1.57620800 2.33413900 -2.71801800

H -0.67180700 1.38973800 -2.26845000  
H -0.53680600 3.01069800 -1.58207700  
O -1.90838000 1.56534300 0.16046300  
S -3.00406700 0.60660500 -0.36028900  
O -3.32367000 -0.37617100 0.60965600  
O -2.79455900 0.24413300 -1.71817000  
C -4.36598900 1.83834700 -0.33574600  
F -5.47321500 1.23112900 -0.73989700  
F -4.09657700 2.84378400 -1.15745400  
F -4.54954200 2.31270200 0.88724200  
H -0.25915100 -0.38334000 0.98968700  
H -0.49622700 -0.62617400 -0.74476000

### **1-Fluoroadmantane**

Electronic Energy: -489.864019142 Hartree

C 0.00000000 0.00000000 0.00000000  
C -0.48547200 0.95602800 1.07059600  
C -0.00021100 2.36134800 0.77832500  
C 1.52753800 2.36607100 0.77739600  
C 2.03473900 1.40639800 -0.29543800  
C 1.52776900 -0.00316400 -0.00338600  
C 2.03452500 -0.45253000 1.36418100  
C 1.52719900 0.50524300 2.43863700



C -0.00049300 0.50666600 2.43392800  
H -0.39182600 1.18482100 3.19647000  
H -0.39173200 -0.49201300 2.64388000  
C 2.03438700 1.91422100 2.14409600  
H 3.12795600 1.92860400 2.16037600  
H 1.69144500 2.60598400 2.91892400  
H 1.88492200 0.18199200 3.41934700  
H 1.69150200 -1.46942600 1.57583700  
H 3.12808900 -0.47385400 1.36884600  
H 1.88570500 -0.69082500 -0.77360600  
H 1.69189000 1.73155900 -1.28197000  
H 3.12830700 1.41321100 -0.31599200  
H 1.88541400 3.37695700 0.56696900  
H -0.39120500 2.68288100 -0.19028400  
H -0.39139600 3.04248000 1.53828300  
F -1.88447200 0.95600400 1.07052100  
H -0.39112600 -0.99954100 0.20596200  
H -0.39096700 0.31746800 -0.96995300

**NO<sub>2</sub>-C<sub>6</sub>H<sub>4</sub>-I(OTf)(F)**

Electronic Energy: -1794.83916486 Hartree

S 0.00000000 0.00000000 0.00000000  
O -1.06648200 0.53263200 0.94945800

I -2.01917000 2.41019300 0.60554000  
F -3.11494500 3.99681700 0.39936200  
C -3.78404800 1.30347300 0.64183300  
C -4.89665600 1.91867700 1.17893400  
C -6.08838400 1.22258900 1.19707400  
C -6.11762600 -0.05256300 0.67970800  
C -5.00728000 -0.66235200 0.14127400  
C -3.81102300 0.02728100 0.11889400  
H -2.92866200 -0.44202300 -0.29477400  
H -5.08163800 -1.66406300 -0.25868500  
N -7.39313200 -0.79497000 0.70193500  
O -8.34735700 -0.23869500 1.18494500  
O -7.39404900 -1.90615600 0.23606700  
H -6.98759700 1.65806200 1.60999100  
H -4.84844100 2.92758200 1.56459800  
O -0.45376200 -1.16601200 -0.67295800  
C 1.23774400 -0.55683900 1.23466300  
F 2.28234300 -1.06100400 0.59523500  
F 1.63446900 0.47177400 1.97531200  
F 0.71826000 -1.48454400 2.02548900  
O 0.59857000 1.06834000 -0.72917600

## References

1. Sharp-Bucknall, L.; Tania; Dutton, J. L., *Angew. Chem. Int. Ed.* **2022**, *61*, e202212380.
2. Winterson, B.; Rennigholtz, T.; Wirth, T., *Chem. Sci.* **2021**, *12*, 9053-9059.
3. Liu, G.-B., *Synlett* **2006**, *2006*, 1431-1433.
4. Takeuchi, K.; Moriyama, T.; Kinoshita, T.; Tachino, H.; Okamoto, K., *Chem. Lett.* **1980**, *9*, 1395-1398.
5. Rickert, A.; Krombach, V.; Hamers, O.; Zorn, H.; Maison, W., *Green Chem.* **2012**, *14*, 639-644.
6. Heyd, J.; Scuseria, G. E.; Ernzerhof, M., *J. Chem. Phys.* **2003**, *118*, 8207-8215.
7. Heyd, J.; Scuseria, G. E., *J. Chem. Phys.* **2004**, *120*, 7274-7280.
8. Weigend, F.; Ahlrichs, R., *Phys. Chem. Chem. Phys.* **2005**, *7*, 3297-3305.
